# Supplementary material for: Early Biological Modulations Resulting from 1-Week Venlafaxine Exposure of Marine Mussels Mytilus galloprovincialis Determined by a Metabolomic Approach
Source: MDPI journal article supplement (doi:10.3390/metabo12030197), 2022-02-22

# Supplementary data

**Table S1:** Complete table of modulated metabolites in digestive glands of male and female mussels after 1, 3 and 7 days of exposure to VLF sorted by their metabolic pathway (†: metabolites present in several pathways). Difference amplitudes are expressed in percentages. Bold values are for significant modulations ( $p < 0.05$ ), other black values represent a trend of modulation ( $p < 0.1$ ) and grey values are for modulations with a  $p$ -value  $> 0.1$ . Slashes represent signals with a difference amplitude  $< 20\%$  and are considered as not modulated. ND: Not Detected. Some metabolites from different pathways were not able to differentiate and a number in brackets was attributed to them.

| Metabolism Pathway                              | Metabolite                                    | Rt (min) | Adduct   | Calculated mass | Observed mass | $\Delta m/z$ (ppm) | RSD QC_M | M1       |        | M3       |        | M7       |        | RSD QC_F | F1       |        | F3       |        | RSD QC | F7       |        | Annotation level |
|-------------------------------------------------|-----------------------------------------------|----------|----------|-----------------|---------------|--------------------|----------|----------|--------|----------|--------|----------|--------|----------|----------|--------|----------|--------|--------|----------|--------|------------------|
|                                                 |                                               |          |          |                 |               |                    |          | Diff Amp | pvalue | Diff Amp | pvalue | Diff Amp | pvalue |          | Diff Amp | pvalue | Diff Amp | pvalue |        | Diff Amp | pvalue |                  |
| Acetylcholine synthesis                         | Glycerophosphorylcholine                      | 1,53     | M+H+     | 258,11010       | 258,10972     | 1,5                | 13,42    | /        | > 0.1  | /        | < 0.05 | /        | > 0.1  | 7,82     | ↗+29     | < 0.1  | ↗+25     | < 0.1  | 4,00   | /        | > 0.1  | 1                |
|                                                 | Propionylcholine                              | 4,46     | M+       | 160,13375       | 160,13307     | 4,3                | 4,78     | ↗+90     | < 0.05 | ↘-25     | > 0.1  | /        | > 0.1  | 8,36     | /        | > 0.1  | /        | > 0.1  | 5,17   | ↗+20     | > 0.1  | 2                |
| Alanine, aspartate and glutamate Metabolism     | Acetic acid† (1)                              | 1,22     | M+FA-H-  | 105,01933       | 105,01920     | 1,2                | 40,84    | /        | > 0.1  | /        | > 0.1  | /        | > 0.1  | 5,52     | /        | < 0.05 | /        | > 0.1  | 2,71   | /        | > 0.1  | 1                |
|                                                 | Aspartylphenylalanine†                        | 11,03    | M+H+     | 281,11320       | 281,11302     | 0,6                | 5,87     | ↗+70     | < 0.05 | ↘-39     | < 0.05 | ↘-28     | < 0.05 | 13,03    | ↘-38     | < 0.05 | ↘-27     | < 0.05 | 11,46  | ↘-31     | > 0.1  | 2                |
|                                                 | Citric acid†                                  | 1,43     | M-H-     | 191,01973       | 191,01947     | 1,3                | 6,52     | ↘-43     | > 0.1  | ↗+26     | > 0.1  | /        | > 0.1  | 4,63     | ↗+104    | > 0.1  | ↗+44     | > 0.1  | 37,04  | /        | > 0.1  | 1                |
|                                                 | Fumaric acid†                                 | 1,65     | M-H-     | 115,00368       | 115,00356     | 1,1                | 62,36    | /        | > 0.1  | /        | > 0.1  | /        | > 0.1  | 3,66     | /        | < 0.1  | /        | > 0.1  | 89,01  | /        | > 0.1  | 1                |
|                                                 | Gamma-l-glutamyl-l-leucine                    | 9,63     | M+H+     | 261,14450       | 261,14405     | 1,7                | 5,65     | /        | > 0.1  | /        | > 0.1  | /        | > 0.1  | 9,50     | ↘-33     | < 0.05 | ↘-23     | < 0.1  | 7,56   | ↗+26     | > 0.1  | 1                |
|                                                 | Glucosamine-6-phosphate†                      | 0,97     | M-H-     | 258,03843       | 258,03795     | 1,9                | 4,57     | /        | > 0.1  | /        | > 0.1  | /        | > 0.1  | 2,46     | /        | > 0.1  | /        | > 0.1  | 3,27   | /        | > 0.1  | 1                |
|                                                 | Glyoxylic acid†                               | 1,25     | M-H-     | 72,99312        | 72,99286      | 3,5                | 43,46    | /        | < 0.05 | /        | > 0.1  | /        | > 0.1  | 3,90     | /        | < 0.1  | /        | > 0.1  | 2,55   | /        | > 0.1  | 1                |
|                                                 | Isovalerylalanine                             | 9,44     | M+H+     | 174,11247       | 174,11235     | 0,7                | 7,99     | /        | > 0.1  | /        | > 0.1  | /        | < 0.1  | 8,53     | ↘-34     | < 0.05 | ↘-31     | < 0.05 | 6,34   | /        | < 0.1  | 2                |
|                                                 | L-Alanine† (2)                                | 1,45     | M+H+     | 90,05495        | 90,05490      | 0,6                | 3,24     | /        | > 0.1  | ↘-22     | > 0.1  | /        | > 0.1  | 10,48    | /        | > 0.1  | /        | > 0.1  | 44,32  | /        | < 0.05 | 1                |
|                                                 | L-aspartic acid†                              | 1,27     | M-H-     | 132,03023       | 132,02999     | 1,8                | 18,20    | /        | > 0.1  | /        | > 0.1  | /        | < 0.05 | 1,19     | /        | > 0.1  | /        | > 0.1  | 3,38   | /        | > 0.1  | 1                |
|                                                 | L-citrulline†                                 | 1,28     | M-H-     | 174,08842       | 174,08694     | 8,5                | ND       | ND       | ND     | ND       | ND     | ND       | ND     | 61,54    | /        | > 0.1  | /        | > 0.1  | ND     | ND       | ND     | 1                |
|                                                 | L-Glutamic acid†                              | 1,36     | M-H-     | 146,04588       | 146,04563     | 1,7                | 19,06    | /        | > 0.1  | /        | > 0.1  | /        | > 0.1  | 1,94     | /        | > 0.1  | /        | > 0.1  | 2,83   | /        | > 0.1  | 1                |
|                                                 | Malonic acid† (3)                             | 1,52     | M-H-     | 103,00368       | 103,00355     | 1,3                | 6,72     | /        | > 0.1  | /        | > 0.1  | /        | > 0.1  | 14,66    | ↗+98     | > 0.1  | ↗+35     | > 0.1  | 9,81   | ↘-24     | > 0.1  | 1                |
|                                                 | N-acetyl-L-aspartic acid                      | 1,48     | M-H-     | 174,04080       | 174,04055     | 1,4                | 4,65     | ↘-33     | < 0.1  | /        | > 0.1  | ↗+25     | > 0.1  | 4,79     | /        | > 0.1  | ↗+40     | < 0.1  | 9,45   | ↘-40     | < 0.1  | 1                |
|                                                 | N-Acetyl-L-glutamic acid                      | 1,85     | M-H-     | 188,05645       | 188,05609     | 1,9                | 24,42    | /        | > 0.1  | /        | > 0.1  | /        | > 0.1  | 13,39    | ↘-44     | < 0.05 | /        | > 0.1  | 9,17   | /        | > 0.1  | 1                |
|                                                 | Succinic acid†                                | 1,89     | M-H-     | 117,01933       | 117,01914     | 1,6                | 4,98     | ↘-25     | > 0.1  | /        | > 0.1  | ↗+85     | < 0.1  | 2,51     | ↘-28     | > 0.1  | /        | > 0.1  | 4,26   | ↗+24     | > 0.1  | 1                |
| Amino Sugar Metabolism                          | Acetic acid† (1)                              | 1,22     | M+FA-H-  | 105,01933       | 105,01920     | 1,2                | 40,84    | /        | > 0.1  | /        | > 0.1  | /        | > 0.1  | 5,52     | /        | < 0.05 | /        | > 0.1  | 2,71   | /        | > 0.1  | 1                |
|                                                 | Glucosamine                                   | 2,07     | M+H+     | 180,08665       | 180,08640     | 1,4                | 25,60    | /        | > 0.1  | /        | > 0.1  | ↘-37     | < 0.05 | 16,32    | /        | > 0.1  | /        | > 0.1  | 18,44  | ↘-28     | < 0.1  | 1                |
|                                                 | Glucosamine-6-phosphate†                      | 0,97     | M-H-     | 258,03843       | 258,03795     | 1,9                | 4,57     | /        | > 0.1  | /        | > 0.1  | /        | > 0.1  | 2,46     | /        | > 0.1  | /        | > 0.1  | 3,27   | /        | > 0.1  | 1                |
|                                                 | N-Acetyl-D-glucosamine or N-Acetylmannosamine | 1,21     | M+FA-H-  | 266,08814       | 266,08776     | 1,4                | 8,38     | /        | > 0.1  | /        | > 0.1  | ↗+30     | < 0.05 | 10,46    | /        | > 0.1  | /        | > 0.1  | 1,59   | ↗+23     | > 0.1  | 1                |
|                                                 | 2-Oxoarginine                                 | 1,92     | M-H2O-H- | 154,06165       | 154,06192     | -1,7               | 6,87     | /        | > 0.1  | /        | > 0.1  | /        | > 0.1  | 9,72     | /        | > 0.1  | ↘-48     | < 0.05 | 27,51  | /        | > 0.1  | 2                |
| Arginine and Proline Metabolism and derivatives | 4-(Glutamylamino) butanoate                   | 3,13     | M+H+     | 233,11320       | 233,11304     | 0,7                | 20,30    | /        | > 0.1  | /        | > 0.1  | /        | > 0.1  | 6,53     | /        | < 0.1  | ↘-31     | < 0.05 | 24,74  | ↘-38     | < 0.05 | 2                |
|                                                 | 4-hydroxyproline† (4)                         | 1,22     | M+H+     | 132,06552       | 132,06536     | 1,2                | 39,47    | /        | < 0.05 | /        | > 0.1  | /        | > 0.1  | 8,48     | /        | > 0.1  | ↗+28     | > 0.1  | 9,59   | /        | > 0.1  | 1                |
|                                                 | 5-aminovaleric acid†                          | 3,07     | M+H+     | 118,08625       | 118,08603     | 1,9                | 27,78    | /        | > 0.1  | /        | > 0.1  | /        | > 0.1  | 24,76    | /        | > 0.1  | /        | > 0.1  | 34,31  | /        | > 0.1  | 1                |
|                                                 | Creatinine                                    | 13,07    | 2M+H+    | 227,12510       | 227,12511     | -0,1               | 6,88     | ↘-32     | < 0.05 | /        | > 0.1  | /        | > 0.1  | 16,98    | /        | > 0.1  | /        | > 0.1  | 42,97  | /        | > 0.1  | 1                |
|                                                 | Fumaric acid†                                 | 1,65     | M-H-     | 115,00368       | 115,00356     | 1,1                | 62,36    | /        | > 0.1  | /        | > 0.1  | /        | > 0.1  | 3,66     | /        | < 0.1  | /        | > 0.1  | 89,01  | /        | > 0.1  | 1                |
|                                                 | Gamma-glutamyl-L-putrescine                   | 3,94     | M-H2O+H+ | 200,13880       | 200,13936     | -2,8               | 19,66    | ↗+23     | > 0.1  | ↘-44     | < 0.1  | /        | > 0.1  | 21,84    | /        | > 0.1  | ↘-37     | > 0.1  | ND     | ND       | ND     | 2                |
|                                                 | Glyoxylic acid†                               | 1,25     | M-H-     | 72,99312        | 72,99286      | 3,5                | 43,46    | /        | < 0.05 | /        | > 0.1  | /        | > 0.1  | 3,90     | /        | < 0.1  | /        | > 0.1  | 2,55   | /        | > 0.1  | 1                |
|                                                 | L-4-Hydroxyglutamate semialdehyde             | 1,56     | M-H2O-H- | 128,03477       | 128,03516     | -3,1               | 12,22    | /        | > 0.1  | ↘-22     | > 0.1  | /        | > 0.1  | 4,23     | /        | > 0.1  | ↗+34     | > 0.1  | 5,77   | ↘-36     | < 0.05 | 2                |
|                                                 | L-Arginine†                                   | 2,63     | M+H+     | 175,11895       | 175,11873     | 1,3                | 17,58    | /        | > 0.1  | /        | > 0.1  | /        | > 0.1  | 22,52    | ↗+39     | > 0.1  | /        | < 0.1  | 6,56   | ↘-38     | < 0.1  | 1                |
|                                                 | L-Aspartate-semialdehyde†                     | 1,44     | M-H-     | 116,03532       | 116,03517     | 1,3                | 5,04     | ↘-25     | > 0.1  | /        | > 0.1  | ↗+22     | > 0.1  | 3,23     | /        | > 0.1  | ↗+28     | < 0.05 | 4,14   | /        | > 0.1  | 2                |
|                                                 | L-aspartic acid†                              | 1,27     | M-H-     | 132,03023       | 132,02999     | 1,8                | 18,20    | /        | > 0.1  | /        | > 0.1  | /        | < 0.05 | 1,19     | /        | > 0.1  | /        | > 0.1  | 3,38   | /        | > 0.1  | 1                |
|                                                 | L-citrulline†                                 | 1,28     | M-H-     | 174,08842       | 174,08694     | 8,5                | ND       | ND       | ND     | ND       | ND     | ND       | ND     | 61,54    | /        | > 0.1  | /        | > 0.1  | ND     | ND       | ND     | 1                |
|                                                 | L-Glutamic acid†                              | 1,36     | M-H-     | 146,04588       | 146,04563     | 1,7                | 19,06    | /        | > 0.1  | /        | > 0.1  | /        | > 0.1  | 1,94     | /        | > 0.1  | /        | > 0.1  | 2,83   | /        | > 0.1  | 1                |
|                                                 | L-Glutamine†                                  | 1,26     | M+H+     | 147,07642       | 147,07623     | 1,3                | 10,01    | /        | > 0.1  | ↘-23     | > 0.1  | /        | < 0.05 | 5,26     | /        | > 0.1  | ↘-38     | < 0.05 | 9,98   | ↘-33     | < 0.05 | 1                |
|                                                 | L-Ornithine†                                  | 2,35     | M+H+     | 133,09715       | 133,09695     | 1,5                | 5,46     | /        | > 0.1  | /        | > 0.1  | /        | > 0.1  | 54,70    | /        | < 0.05 | /        | < 0.05 | 6,51   | ↘-32     | > 0.1  | 1                |
|                                                 | L-Proline                                     | 1,42     | M+H+     | 116,07060       | 116,07057     | 0,3                | 4,09     | /        | > 0.1  | /        | > 0.1  | /        | > 0.1  | 8,77     | /        | < 0.05 | /        | > 0.1  | 2,50   | /        | > 0.1  | 1                |
|                                                 | N-acetylproline                               | 3,01     | M-H-     | 156,06662       | 156,06628     | 2,2                | 9,59     | /        | > 0.1  | ↘-20     | > 0.1  | ↗+58     | > 0.1  | 7,08     | /        | > 0.1  | /        | > 0.1  | 6,06   | /        | > 0.1  | 1                |
|                                                 | N4-Acetylaminobutanal (5)                     | 2,04     | M+H+     | 130,08625       | 130,08620     | 0,4                | 8,24     | ↗+27     | > 0.1  | /        | > 0.1  | ↗+26     | > 0.1  | 11,48    | ↘-37     | > 0.1  | ↘-22     | > 0.1  | 6,41   | ↗+28     | > 0.1  | 2                |

| Metabolism Pathway                              | Metabolite                            | Rt (min) | Adduct                | Calculated mass | Observed mass | $\Delta m/z$ (ppm) | RSD QC_M | M1<br>Diff Amp | pvalue | M3<br>Diff Amp | pvalue | M7<br>Diff Amp | pvalue | RSD QC_F | F1<br>Diff Amp | pvalue | F3<br>Diff Amp | pvalue | RSD QC | F7<br>Diff Amp | pvalue | Annotation level |
|-------------------------------------------------|---------------------------------------|----------|-----------------------|-----------------|---------------|--------------------|----------|----------------|--------|----------------|--------|----------------|--------|----------|----------------|--------|----------------|--------|--------|----------------|--------|------------------|
| Arginine and Proline Metabolism and derivatives | Proline betaine                       | 1,49     | M+H+                  | 144,10190       | 144,10174     | 1,1                | 3,72     | /              | > 0.1  | /              | < 0.05 | /              | > 0.1  | 4,32     | /              | > 0.1  | /              | > 0.1  | 4,67   | ↘-26           | > 0.1  | 1                |
|                                                 | Putrescine <sup>†</sup>               | 5,43     | M+H+                  | 89,10732        | 89,10718      | 1,6                | 24,40    | /              | > 0.1  | /              | > 0.1  | /              | > 0.1  | 30,59    | /              | > 0.1  | /              | > 0.1  | 27,43  | /              | > 0.1  | 1                |
|                                                 | Sarcosine <sup>†</sup> (2)            | 1,45     | M+H+                  | 90,05495        | 90,05490      | 0,6                | 3,24     | /              | > 0.1  | ↘-22           | > 0.1  | /              | > 0.1  | 10,48    | /              | > 0.1  | /              | > 0.1  | 44,32  | /              | < 0.05 | 1                |
|                                                 | Succinic acid <sup>†</sup>            | 1,89     | M-H-                  | 117,01933       | 117,01914     | 1,6                | 4,98     | ↘-25           | > 0.1  | /              | > 0.1  | ↗+85           | < 0.1  | 2,51     | ↘-28           | > 0.1  | /              | > 0.1  | 4,26   | ↗+24           | > 0.1  | 1                |
|                                                 | Symmetric dimethylarginine            | 3,45     | M+H+                  | 203,15025       | 203,15016     | 0,4                | 13,70    | /              | > 0.1  | ↘-21           | < 0.1  | ↘-27           | > 0.1  | 6,80     | /              | < 0.1  | ↘-46           | < 0.05 | 4,45   | ↘-47           | < 0.05 | 2                |
| beta-Alanine Metabolism                         | Hydroxypropionic acid <sup>†</sup>    | 1,55     | M-H-                  | 89,02442        | 89,02440      | 0,2                | 7,75     | /              | > 0.1  | /              | > 0.1  | ↗+68           | < 0.05 | 3,98     | /              | > 0.1  | /              | < 0.05 | 6,90   | ↘-26           | > 0.1  | 1                |
|                                                 | L-aspartic acid <sup>†</sup>          | 1,27     | M-H-                  | 132,03023       | 132,02999     | 1,8                | 18,20    | /              | > 0.1  | /              | > 0.1  | /              | < 0.05 | 1,19     | /              | > 0.1  | /              | > 0.1  | 3,38   | /              | > 0.1  | 1                |
|                                                 | L-Histidine <sup>†</sup>              | 2,23     | M+H+                  | 156,07675       | 156,07670     | 0,3                | 4,58     | /              | > 0.1  | /              | > 0.1  | /              | < 0.1  | 40,78    | /              | > 0.1  | /              | > 0.1  | 5,61   | /              | > 0.1  | 1                |
|                                                 | N-Acetyl-beta-alanine (4)             | 1,77     | M-H-                  | 130,05097       | 130,05079     | 1,4                | 5,91     | /              | > 0.1  | /              | > 0.1  | /              | > 0.1  | 1,91     | /              | < 0.05 | /              | < 0.1  | 10,49  | /              | > 0.1  | 1                |
|                                                 | Pantothenic acid                      | 2,64     | M-H-                  | 218,10340       | 218,10307     | 1,5                | 8,70     | /              | > 0.1  | ↘-20           | > 0.1  | /              | > 0.1  | 3,37     | /              | > 0.1  | /              | > 0.1  | 4,07   | ↗+24           | > 0.1  | 1                |
| Betaine Metabolism                              | Uracil <sup>†</sup>                   | 1,52     | M-H-                  | 111,02000       | 111,01988     | 1,1                | 6,25     | /              | > 0.1  | /              | > 0.1  | /              | > 0.1  | 16,21    | ↘-40           | < 0.05 | /              | > 0.1  | 5,90   | /              | > 0.1  | 1                |
|                                                 | Betaine <sup>†</sup>                  | 1,33     | M+H+                  | 118,08625       | 118,08605     | 1,7                | 4,03     | /              | > 0.1  | /              | > 0.1  | /              | > 0.1  | 9,17     | /              | > 0.1  | /              | < 0.05 | 3,63   | /              | > 0.1  | 1                |
|                                                 | Choline <sup>†</sup>                  | 2,51     | M+                    | 104,10754       | 104,10685     | 6,6                | 4,35     | /              | > 0.1  | /              | > 0.1  | /              | > 0.1  | 11,16    | /              | < 0.1  | /              | > 0.1  | 2,55   | /              | > 0.1  | 1                |
|                                                 | L-Lysine <sup>†</sup>                 | 2,50     | M+H+                  | 147,11280       | 147,11261     | 1,3                | 5,22     | /              | > 0.1  | ↘-33           | > 0.1  | /              | > 0.1  | 12,04    | ↗+39           | > 0.1  | ↘-57           | < 0.05 | 4,00   | ↘-38           | > 0.1  | 1                |
|                                                 | Pimelic acid                          | 8,54     | M-H-                  | 159,06628       | 159,06601     | 1,7                | 1,98     | ↗+61           | > 0.1  | ↘-25           | > 0.1  | /              | > 0.1  | 3,23     | ↗+47           | < 0.1  | ↗+21           | > 0.1  | 2,51   | /              | > 0.1  | 1                |
| Citrate cycle                                   | Citric acid <sup>†</sup>              | 1,43     | M-H-                  | 191,01973       | 191,01947     | 1,3                | 6,52     | ↘-43           | > 0.1  | ↗+26           | > 0.1  | /              | > 0.1  | 4,63     | ↗+104          | > 0.1  | ↗+44           | > 0.1  | 37,04  | /              | > 0.1  | 1                |
|                                                 | Fumaric acid <sup>†</sup>             | 1,65     | M-H-                  | 115,00368       | 115,00356     | 1,1                | 62,36    | /              | > 0.1  | /              | > 0.1  | /              | > 0.1  | 3,66     | /              | < 0.1  | /              | > 0.1  | 89,01  | /              | > 0.1  | 1                |
|                                                 | L-malic acid <sup>†</sup>             | 1,33     | M-H-                  | 133,01425       | 133,01402     | 1,7                | 3,82     | /              | > 0.1  | /              | > 0.1  | /              | > 0.1  | 3,09     | /              | < 0.05 | /              | > 0.1  | 4,74   | /              | < 0.05 | 1                |
| Collagen Synthesis                              | 4-hydroxyproline <sup>†</sup> (4)     | 1,22     | M+H+                  | 132,06552       | 132,06536     | 1,2                | 39,47    | /              | < 0.05 | /              | > 0.1  | /              | > 0.1  | 8,48     | /              | > 0.1  | ↗+28           | > 0.1  | 9,59   | /              | > 0.1  | 1                |
|                                                 | Glycylproline                         | 3,25     | M+H+                  | 173,09207       | 173,09164     | 2,5                | 21,86    | /              | > 0.1  | /              | < 0.05 | /              | > 0.1  | 31,78    | /              | > 0.1  | /              | > 0.1  | 8,34   | /              | > 0.1  | 1                |
| Cysteine and methionine Metabolism              | 2-Hydroxyphenethylamine               | 7,81     | M-H <sub>2</sub> O+H+ | 120,08023       | 120,08059     | -3,0               | 2,68     | ↗+30           | < 0.05 | ↘-30           | < 0.05 | /              | < 0.1  | 3,27     | ↘-22           | < 0.05 | ↘-46           | < 0.05 | 4,81   | ↘-27           | < 0.1  | 2                |
|                                                 | Betaine <sup>†</sup>                  | 1,33     | M+H+                  | 118,08625       | 118,08605     | 1,7                | 4,03     | /              | > 0.1  | /              | > 0.1  | /              | > 0.1  | 9,17     | /              | > 0.1  | /              | < 0.05 | 3,63   | /              | > 0.1  | 1                |
|                                                 | Choline <sup>†</sup>                  | 2,51     | M+                    | 104,10754       | 104,10685     | 6,6                | 4,35     | /              | > 0.1  | /              | > 0.1  | /              | > 0.1  | 11,16    | /              | < 0.1  | /              | > 0.1  | 2,55   | /              | > 0.1  | 1                |
|                                                 | L-Alanine <sup>†</sup> (2)            | 1,45     | M+H+                  | 90,05495        | 90,05490      | 0,6                | 3,24     | /              | > 0.1  | ↘-22           | > 0.1  | /              | > 0.1  | 10,48    | /              | > 0.1  | /              | > 0.1  | 44,32  | /              | < 0.05 | 1                |
|                                                 | L-alpha-Aminobutyric acid             | 1,71     | M+H+                  | 104,07060       | 104,07049     | 1,1                | 41,46    | /              | > 0.1  | /              | > 0.1  | /              | > 0.1  | 69,37    | /              | > 0.1  | /              | > 0.1  | 54,30  | ↘-65           | > 0.1  | 1                |
| Glutathione Metabolism                          | L-Aspartate-semialdehyde <sup>†</sup> | 1,44     | M-H-                  | 116,03532       | 116,03517     | 1,3                | 5,04     | ↘-25           | > 0.1  | /              | > 0.1  | ↗+22           | > 0.1  | 3,23     | /              | > 0.1  | ↗+28           | < 0.05 | 4,14   | /              | > 0.1  | 2                |
|                                                 | L-aspartic acid <sup>†</sup>          | 1,27     | M-H-                  | 132,03023       | 132,02999     | 1,8                | 18,20    | /              | > 0.1  | /              | > 0.1  | /              | < 0.05 | 1,19     | /              | > 0.1  | /              | > 0.1  | 3,38   | /              | > 0.1  | 1                |
|                                                 | L-Methionine <sup>†</sup>             | 2,57     | M+H+                  | 150,05833       | 150,05769     | 4,2                | 37,34    | /              | < 0.05 | /              | > 0.1  | /              | > 0.1  | 9,79     | ↘-42           | < 0.05 | ↘-63           | < 0.05 | 12,00  | ↘-40           | > 0.1  | 1                |
|                                                 | L-serine <sup>†</sup>                 | 1,31     | M-H-                  | 104,03532       | 104,03522     | 1,0                | 6,18     | /              | > 0.1  | /              | > 0.1  | /              | > 0.1  | 5,64     | /              | > 0.1  | ↘-22           | > 0.1  | 8,36   | /              | > 0.1  | 1                |
|                                                 | Putrescine <sup>†</sup>               | 5,43     | M+H+                  | 89,10732        | 89,10718      | 1,6                | 24,40    | /              | > 0.1  | /              | > 0.1  | /              | > 0.1  | 30,59    | /              | > 0.1  | /              | > 0.1  | 27,43  | /              | > 0.1  | 1                |
|                                                 | 5-l-glutamyl-l-alanine                | 1,69     | M+H+                  | 219,09755       | 219,09747     | 0,4                | 16,97    | /              | > 0.1  | /              | > 0.1  | /              | > 0.1  | 17,90    | ↘-33           | < 0.05 | /              | > 0.1  | ND     | ND             | ND     | 1                |
|                                                 | Cysteine glutathione disulfide        | 1,30     | M-H-                  | 425,08063       | 425,07952     | 2,6                | ND       | ND             | ND     | ND             | ND     | ND             | ND     | 27,02    | ↗+94           | < 0.05 | ↗+71           | < 0.05 | ND     | ND             | ND     | 1                |
|                                                 | Glycine <sup>†</sup>                  | 1,34     | M+H+                  | 76,03930        | 76,03914      | 2,2                | 16,67    | ↘-29           | > 0.1  | /              | > 0.1  | ↘-21           | < 0.1  | 49,04    | /              | > 0.1  | ↗+85           | < 0.05 | 43,21  | ↘-36           | > 0.1  | 1                |
|                                                 | L-Glutamic acid <sup>†</sup>          | 1,36     | M-H-                  | 146,04588       | 146,04563     | 1,7                | 19,06    | /              | > 0.1  | /              | > 0.1  | /              | > 0.1  | 1,94     | /              | > 0.1  | /              | > 0.1  | 2,83   | /              | > 0.1  | 1                |
|                                                 | L-Ornithine <sup>†</sup>              | 2,35     | M+H+                  | 133,09715       | 133,09695     | 1,5                | 5,46     | /              | > 0.1  | /              | > 0.1  | /              | > 0.1  | 54,70    | /              | < 0.05 | /              | < 0.05 | 6,51   | ↘-32           | > 0.1  | 1                |
|                                                 | Oxidized glutathione                  | 2,17     | M-H-                  | 611,14469       | 611,14429     | 0,6                | 18,02    | /              | > 0.1  | ↘-31           | > 0.1  | /              | > 0.1  | 3,81     | ↗+59           | > 0.1  | /              | > 0.1  | 11,82  | /              | > 0.1  | 1                |
|                                                 | Putrescine <sup>†</sup>               | 5,43     | M+H+                  | 89,10732        | 89,10718      | 1,6                | 24,40    | /              | > 0.1  | /              | > 0.1  | /              | > 0.1  | 30,59    | /              | > 0.1  | /              | > 0.1  | 27,43  | /              | > 0.1  | 1                |
|                                                 | Pyroglutamic acid                     | 1,56     | M-H-                  | 128,03532       | 128,03517     | 1,1                | 12,22    | /              | > 0.1  | ↘-22           | > 0.1  | /              | > 0.1  | 4,23     | /              | > 0.1  | ↗+34           | > 0.1  | 5,90   | ↘-33           | < 0.05 | 1                |
|                                                 | 5-aminolevulinic acid (4)             | 1,22     | M+H+                  | 132,06552       | 132,06536     | 1,2                | 39,47    | /              | < 0.05 | /              | > 0.1  | /              | > 0.1  | 8,48     | /              | > 0.1  | ↗+28           | > 0.1  | 9,59   | /              | > 0.1  | 1                |
|                                                 | Aminoacetone                          | 1,33     | M+FA-H-               | 118,05096       | 118,05084     | 1,1                | 3,18     | /              | > 0.1  | /              | > 0.1  | /              | > 0.1  | 4,40     | /              | > 0.1  | ↘-25           | < 0.05 | 2,94   | /              | > 0.1  | 2                |
| Glycine, serine and threonine Metabolism        | Betaine <sup>†</sup>                  | 1,33     | M+H+                  | 118,08625       | 118,08605     | 1,7                | 4,03     | /              | > 0.1  | /              | > 0.1  | /              | > 0.1  | 9,17     | /              | > 0.1  | /              | < 0.05 | 3,63   | /              | > 0.1  | 1                |
|                                                 | Choline <sup>†</sup>                  | 2,51     | M+                    | 104,10754       | 104,10685     | 6,6                | 4,35     | /              | > 0.1  | /              | > 0.1  | /              | > 0.1  | 11,16    | /              | < 0.1  | /              | > 0.1  | 2,55   | /              | > 0.1  | 1                |
|                                                 | DL-2-hydroxybutyric acid              | 2,09     | M-H-                  | 103,04007       | 103,03995     | 1,1                | 19,17    | ↗+23           | > 0.1  | /              | > 0.1  | /              | > 0.1  | 4,99     | ↗+43           | < 0.05 | /              | > 0.1  | 19,70  | /              | > 0.1  | 1                |
|                                                 | Glyceric acid <sup>†</sup> (1)        | 1,24     | M-H-                  | 105,01933       | 105,01917     | 1,5                | 2,66     | /              | > 0.1  | /              | > 0.1  | /              | > 0.1  | 4,38     | /              | < 0.05 | /              | > 0.1  | 0,85   | /              | > 0.1  | 1                |
|                                                 | Glycine <sup>†</sup>                  | 1,34     | M+H+                  | 76,03930        | 76,03914      | 2,2                | 16,67    | ↘-29           | > 0.1  | /              | > 0.1  | ↘-21           | < 0.1  | 49,04    | /              | > 0.1  | ↗+85           | < 0.05 | 43,21  | ↘-36           | > 0.1  | 1                |
|                                                 | Glyoxylic acid <sup>†</sup>           | 1,25     | M-H-                  | 72,99312        | 72,99286      | 3,5                | 43,46    | /              | < 0.05 | /              | > 0.1  | /              | > 0.1  | 3,90     | /              | < 0.1  | /              | > 0.1  | 2,55   | /              | > 0.1  | 1                |
|                                                 | Hydroxypyruvic acid (3)               | 1,52     | M-H-                  | 103,00368       | 103,00355     | 1,3                | 6,28     | /              | > 0.1  | /              | > 0.1  | /              | > 0.1  | 18,51    | ↗+68           | > 0.1  | ↗+191          | < 0.05 | 10,22  | ↘-22           | > 0.1  | 1                |
|                                                 | L-allothreonine or L-threonine        | 1,33     | M-H-                  | 118,05097       | 118,05084     | 1,1                | 3,18     | /              | > 0.1  | /              | > 0.1  | /              | > 0.1  | 4,40     | /              | > 0.1  | ↘-25           | < 0.05 | 101,41 | ↗+47           | > 0.1  | 1                |
|                                                 | L-Arginine <sup>†</sup>               | 2,63     | M+H+                  | 175,11895       | 175,11873     | 1,3                | 17,58    | /              | > 0.1  | /              | > 0.1  | /              | > 0.1  | 22,52    | ↗+39           | > 0.1  | /              | < 0.1  | 6,56   | ↘-38           | < 0.1  | 1                |
|                                                 | L-Aspartate-semialdehyde <sup>†</sup> | 1,44     | M-H-                  | 116,03532       | 116,03517     | 1,3                | 5,04     | ↘-25           | > 0.1  | /              | > 0.1  | ↗+22           | > 0.1  | 3,23     | /              | > 0.1  | ↗+28           | < 0.05 | 4,14   | /              | > 0.1  | 2                |
|                                                 | L-aspartic acid <sup>†</sup>          | 1,27     | M-H-                  | 132,03023       | 132,02999     | 1,8                | 18,20    | /              | > 0.1  | /              | > 0.1  | /              | < 0.05 | 1,19     | /              | > 0.1  | /              | > 0.1  | 3,38   | /              | > 0.1  | 1                |

| Metabolism Pathway                       | Metabolite                        | Rt (min) | Adduct                | Calculated mass | Observed mass | $\Delta m/z$ (ppm) | RSD QC_M | M1<br>Diff Amp | pvalue | M3<br>Diff Amp | pvalue | M7<br>Diff Amp | pvalue | RSD QC_F | F1<br>Diff Amp | pvalue | F3<br>Diff Amp | pvalue | RSD QC | F7<br>Diff Amp | pvalue | Annotation level |
|------------------------------------------|-----------------------------------|----------|-----------------------|-----------------|---------------|--------------------|----------|----------------|--------|----------------|--------|----------------|--------|----------|----------------|--------|----------------|--------|--------|----------------|--------|------------------|
| Glycine, serine and threonine Metabolism | L-Homoserine                      | 1,38     | M+H+                  | 120,06552       | 120,06537     | 1,2                | 16,80    | ↘-26           | < 0.1  | ↘-20           | > 0.1  | /              | > 0.1  | 27,68    | /              | > 0.1  | /              | > 0.1  | 6,97   | /              | > 0.1  | 1                |
|                                          | L-Methionine†                     | 2,57     | M+H+                  | 150,05833       | 150,05769     | 4,2                | 37,34    | /              | < 0.05 | /              | > 0.1  | /              | > 0.1  | 9,79     | ↘-42           | < 0.05 | ↘-63           | < 0.05 | 12,00  | ↘-40           | > 0.1  | 1                |
|                                          | L-serine†                         | 1,31     | M-H-                  | 104,03532       | 104,03522     | 1,0                | 6,18     | /              | > 0.1  | /              | > 0.1  | /              | > 0.1  | 5,64     | /              | > 0.1  | ↘-22           | > 0.1  | 8,36   | /              | > 0.1  | 1                |
|                                          | L-Tryptophan†                     | 11,58    | M+H+                  | 205,09715       | 205,09700     | 0,7                | 6,00     | /              | > 0.1  | ↘-29           | < 0.05 | /              | > 0.1  | 7,93     | /              | < 0.05 | ↘-46           | < 0.05 | 26,28  | /              | > 0.1  | 1                |
|                                          | N-Acetyl-L-threonine              | 1,50     | M-H-                  | 160,06153       | 160,06128     | 1,6                | 10,64    | ↘-24           | > 0.1  | /              | > 0.1  | ↗+32           | < 0.1  | 13,62    | ↘-26           | < 0.05 | ↗+27           | < 0.05 | 21,75  | /              | > 0.1  | 1                |
| Histidine Metabolism                     | Sarcosine† (2)                    | 1,45     | M+H+                  | 90,05495        | 90,05490      | 0,6                | 3,24     | /              | > 0.1  | ↘-22           | > 0.1  | /              | > 0.1  | 10,48    | /              | > 0.1  | /              | > 0.1  | 44,32  | /              | < 0.05 | 1                |
|                                          | 3'-AMP†                           | 1,21     | M+H+                  | 348,07036       | 348,06994     | 1,2                | 22,88    | /              | > 0.1  | ↘-37           | > 0.1  | /              | > 0.1  | 17,48    | ↗+472          | > 0.1  | /              | > 0.1  | 16,86  | /              | > 0.1  | 1                |
|                                          | or Adenosine monophosphate†       |          |                       |                 |               |                    |          |                |        |                |        |                |        |          |                |        |                |        |        |                |        |                  |
|                                          | Carnosine                         | 3,56     | M+H+                  | 227,11387       | 227,11384     | 0,1                | ND       | ND             | ND     | ND             | ND     | ND             | ND     | 35,44    | /              | > 0.1  | ↘-51           | < 0.05 | ND     | ND             | ND     | 1                |
|                                          | Histamine                         | 5,84     | M+H+                  | 112,08692       | 112,08671     | 1,9                | 60,63    | ↘-75           | < 0.05 | ↗+188          | < 0.05 | ↗+108          | > 0.1  | 13,54    | ↘-36           | < 0.1  | ↘-26           | > 0.1  | 39,81  | ↗+115          | > 0.1  | 1                |
| Lysine biosynthesis or degradation       | L-aspartic acid†                  | 1,27     | M-H-                  | 132,03023       | 132,02999     | 1,8                | 18,20    | /              | > 0.1  | /              | > 0.1  | /              | < 0.05 | 1,19     | /              | > 0.1  | /              | > 0.1  | 3,38   | /              | > 0.1  | 1                |
|                                          | L-Glutamic acid†                  | 1,36     | M-H-                  | 146,04588       | 146,04563     | 1,7                | 19,06    | /              | > 0.1  | /              | > 0.1  | /              | > 0.1  | 1,94     | /              | > 0.1  | /              | > 0.1  | 2,83   | /              | > 0.1  | 1                |
|                                          | L-Histidine†                      | 2,23     | M+H+                  | 156,07675       | 156,07670     | 0,3                | 4,58     | /              | > 0.1  | /              | > 0.1  | /              | < 0.1  | 40,78    | /              | > 0.1  | /              | > 0.1  | 5,61   | /              | > 0.1  | 1                |
|                                          | Methylimidazoleacetic acid        | 3,10     | M+H+                  | 141,06585       | 141,06572     | 0,9                | 24,65    | /              | > 0.1  | /              | > 0.1  | /              | > 0.1  | 2,79     | /              | > 0.1  | ↘-21           | < 0.1  | ND     | ND             | ND     | 1                |
|                                          | 5-aminovaleric acid†              | 3,07     | M+H+                  | 118,08625       | 118,08603     | 1,9                | 27,78    | /              | > 0.1  | /              | > 0.1  | /              | > 0.1  | 24,76    | /              | > 0.1  | /              | > 0.1  | 34,31  | /              | > 0.1  | 1                |
|                                          | Aminoadipic acid                  | 1,59     | M+H+                  | 162,07608       | 162,07598     | 0,7                | 37,41    | /              | > 0.1  | /              | > 0.1  | /              | > 0.1  | 107,20   | ↗+189          | < 0.1  | /              | > 0.1  | 7,24   | /              | > 0.1  | 1                |
|                                          | Glutaric acid                     | 2,48     | M-H-                  | 131,03498       | 131,03474     | 1,9                | 5,23     | ↗+34           | > 0.1  | /              | > 0.1  | /              | > 0.1  | 3,12     | ↗+41           | < 0.05 | ↗+27           | > 0.1  | 4,06   | /              | > 0.1  | 1                |
|                                          | Glycine†                          | 1,34     | M+H+                  | 76,03930        | 76,03914      | 2,2                | 16,67    | ↘-29           | > 0.1  | /              | > 0.1  | ↘-21           | < 0.1  | 49,04    | /              | > 0.1  | ↗+85           | < 0.05 | 43,21  | ↘-36           | > 0.1  | 1                |
|                                          | L-Aspartate-semialdehyde†         | 1,44     | M-H-                  | 116,03532       | 116,03517     | 1,3                | 5,04     | ↘-25           | > 0.1  | /              | > 0.1  | ↗+22           | > 0.1  | 3,23     | /              | > 0.1  | ↗+28           | < 0.05 | 4,14   | /              | > 0.1  | 2                |
|                                          | L-aspartic acid†                  | 1,27     | M-H-                  | 132,03023       | 132,02999     | 1,8                | 18,20    | /              | > 0.1  | /              | > 0.1  | /              | < 0.05 | 1,19     | /              | > 0.1  | /              | > 0.1  | 3,38   | /              | > 0.1  | 1                |
|                                          | L-Lysine†                         | 2,50     | M+H+                  | 147,11280       | 147,11261     | 1,3                | 5,22     | /              | > 0.1  | ↘-33           | > 0.1  | /              | > 0.1  | 12,04    | ↗+39           | > 0.1  | ↘-57           | < 0.05 | 4,00   | ↘-38           | > 0.1  | 1                |
|                                          | N-Succinyl-2-amino-6-ketopimelate | 2,24     | M+H+                  | 290,08704       | 290,08578     | 4,4                | 34,31    | /              | > 0.1  | ↘-63           | > 0.1  | /              | > 0.1  | 19,31    | ↘-37           | < 0.1  | ↘-50           | < 0.05 | 17,40  | /              | > 0.1  | 2                |
|                                          | N6-Acetyl-L-lysine                | 1,89     | M+H+                  | 189,12337       | 189,12302     | 1,8                | 32,68    | /              | > 0.1  | /              | > 0.1  | ↗+108          | > 0.1  | 29,58    | /              | > 0.1  | /              | < 0.05 | 7,80   | /              | > 0.1  | 1                |
|                                          | Oxadipic acid†                    | 1,63     | M-H-                  | 159,02990       | 159,02996     | -0,4               | 51,01    | /              | < 0.05 | /              | > 0.1  | ND             | ND     | ND       | ND             | ND     | ND             | ND     | ND     | ND             | ND     | 1                |
|                                          | Pipecolic acid (5)                | 2,04     | M+H+                  | 130,08625       | 130,08620     | 0,4                | 8,24     | ↗+27           | > 0.1  | /              | > 0.1  | ↗+26           | > 0.1  | 11,48    | ↘-37           | > 0.1  | ↘-22           | > 0.1  | 11,55  | ↗+38           | < 0.1  | 1                |
|                                          | L-aspartic acid†                  | 1,27     | M-H-                  | 132,03023       | 132,02999     | 1,8                | 18,20    | /              | > 0.1  | /              | > 0.1  | /              | < 0.05 | 1,19     | /              | > 0.1  | /              | > 0.1  | 3,38   | /              | > 0.1  | 1                |
| Nicotinate and Nicotinamide Metabolism   | Niacinamide                       | 2,46     | M+H+                  | 123,05529       | 123,05511     | 1,5                | 10,36    | ↗+71           | > 0.1  | ↘-49           | < 0.1  | /              | > 0.1  | 33,47    | ↗+72           | < 0.1  | /              | > 0.1  | 4,38   | /              | > 0.1  | 1                |
|                                          | Nicotinamide N-oxide              | 3,46     | M+H+                  | 139,05020       | 139,05005     | 1,1                | 8,02     | ↗+32           | > 0.1  | /              | > 0.1  | ↗+256          | < 0.05 | 8,94     | /              | > 0.1  | /              | > 0.1  | 8,68   | ↘-41           | < 0.05 | 2                |
|                                          | Nicotinamide riboside             | 14,29    | M+                    | 255,09810       | 255,09892     | -3,2               | 12,38    | /              | < 0.05 | /              | < 0.05 | /              | > 0.1  | 13,07    | /              | > 0.1  | /              | > 0.1  | 2,52   | ↘-35           | > 0.1  | 1                |
|                                          | Nicotinic acid                    | 1,85     | M+H+                  | 124,03930       | 124,03925     | 0,4                | 9,51     | /              | > 0.1  | /              | > 0.1  | /              | > 0.1  | 3,71     | /              | > 0.1  | /              | > 0.1  | 22,46  | ↘-46           | > 0.1  | 1                |
|                                          | Nicotinuric acid                  | 2,61     | M-H-                  | 179,04622       | 179,04597     | 1,4                | ND       | ND             | ND     | ND             | ND     | ND             | ND     | 20,47    | /              | > 0.1  | /              | > 0.1  | 24,90  | /              | > 0.1  | 1                |
| Pentose phosphate pathway                | Propionic acid                    | 2,02     | M-H-                  | 73,02950        | 73,02933      | 2,4                | 45,91    | ↗+69           | > 0.1  | /              | > 0.1  | ↗+36           | > 0.1  | 3,67     | ↘-34           | > 0.1  | ↗+22           | > 0.1  | 3,84   | ↗+27           | > 0.1  | 1                |
|                                          | Trigonelline                      | 1,45     | M+H+                  | 138,05495       | 138,05480     | 1,1                | 7,20     | /              | > 0.1  | ↘-45           | < 0.05 | /              | > 0.1  | 12,60    | /              | > 0.1  | /              | > 0.1  | 23,87  | /              | > 0.1  | 1                |
|                                          | Deoxyribose                       | 1,21     | M+FA-H-               | 179,05611       | 179,05589     | 1,2                | 4,25     | /              | > 0.1  | ↗+25           | > 0.1  | ↗+43           | < 0.05 | 4,00     | ↘-25           | < 0.1  | /              | > 0.1  | 7,30   | /              | > 0.1  | 1                |
|                                          | Gluconic acid                     | 1,15     | M-H-                  | 195,05103       | 195,05090     | 0,7                | 4,87     | /              | < 0.1  | /              | > 0.1  | ↗+31           | < 0.1  | 6,37     | /              | > 0.1  | /              | > 0.1  | 34,87  | ↘-65           | > 0.1  | 1                |
|                                          | Glyceric acid† (1)                | 1,24     | M-H-                  | 105,01933       | 105,01917     | 1,5                | 2,66     | /              | > 0.1  | /              | > 0.1  | /              | > 0.1  | 4,38     | /              | < 0.05 | /              | > 0.1  | 0,85   | /              | > 0.1  | 1                |
| Phenylalanine Metabolism                 | Ribose 1-phosphate†               | 2,93     | M-H <sub>2</sub> O+H+ | 213,01532       | 213,01594     | -2,9               | 23,48    | ↗+37           | > 0.1  | /              | > 0.1  | /              | > 0.1  | 16,43    | ↗+86           | < 0.05 | ↗+26           | > 0.1  | 15,67  | /              | > 0.1  | 2                |
|                                          | 2-Phenylacetamide                 | 7,97     | M+H+                  | 136,07569       | 136,07553     | 1,2                | 10,47    | ↗+21           | > 0.1  | ↘-22           | < 0.1  | /              | > 0.1  | 60,23    | /              | > 0.1  | /              | < 0.05 | 52,78  | /              | > 0.1  | 1                |
|                                          | 3-(2-Hydroxyphenyl)propanoic acid | 11,30    | M-H-                  | 165,05572       | 165,05520     | 3,1                | 58,73    | /              | > 0.1  | /              | > 0.1  | /              | > 0.1  | 35,75    | /              | > 0.1  | /              | > 0.1  | 3,59   | /              | > 0.1  | 1                |
|                                          | 3-(3-Hydroxyphenyl)propanoic acid | 10,79    | M-H-                  | 165,05572       | 165,05529     | 2,6                | 30,39    | /              | > 0.1  | /              | > 0.1  | /              | > 0.1  | 19,96    | ↗+42           | < 0.05 | ↗+21           | > 0.1  | 25,98  | ↗+41           | < 0.1  | 1                |
|                                          | 3-Hydroxyphenylacetic acid†       | 9,69     | M-H-                  | 151,04007       | 151,03971     | 2,4                | 5,47     | /              | > 0.1  | /              | > 0.1  | /              | > 0.1  | 15,54    | /              | > 0.1  | /              | > 0.1  | 5,06   | /              | > 0.1  | 1                |
|                                          | Aspartylphenylalanine†            | 11,03    | M+H+                  | 281,11320       | 281,11302     | 0,6                | 5,87     | ↗+70           | < 0.05 | ↘-39           | < 0.05 | ↘-28           | < 0.05 | 13,03    | ↘-38           | < 0.05 | ↘-27           | < 0.05 | 11,46  | ↘-31           | > 0.1  | 2                |
|                                          | Fumaric acid†                     | 1,65     | M-H-                  | 115,00368       | 115,00356     | 1,1                | 62,36    | /              | > 0.1  | /              | > 0.1  | /              | > 0.1  | 3,66     | /              | < 0.1  | /              | > 0.1  | 89,01  | /              | > 0.1  | 1                |
|                                          | L-3-phenyllactic acid             | 10,48    | M-H-                  | 165,05572       | 165,05522     | 3,0                | 3,24     | /              | > 0.1  | ↗+130          | < 0.05 | /              | > 0.1  | 4,32     | ↘-55           | < 0.05 | /              | > 0.1  | 4,38   | ↗+32           | > 0.1  | 1                |
|                                          | L-Phenylalanine                   | 7,81     | M+H+                  | 166,08625       | 166,08613     | 0,8                | 3,39     | ↗+31           | < 0.05 | ↘-31           | < 0.05 | /              | < 0.05 | 2,89     | ↘-24           | < 0.05 | ↘-45           | < 0.05 | 14,10  | ↘-51           | > 0.1  | 1                |
|                                          | L-Tyrosine†                       | 3,54     | M+H+                  | 182,08117       | 182,08109     | 0,4                | 3,48     | /              | > 0.1  | ↘-21           | < 0.1  | /              | > 0.1  | 7,07     | /              | < 0.05 | ↘-37           | < 0.05 | 7,35   | /              | > 0.1  | 1                |
|                                          | N-Acetyl-L-phenylalanine          | 10,66    | M-H-                  | 206,08227       | 206,08182     | 2,2                | 3,46     | /              | > 0.1  | /              | > 0.1  | /              | > 0.1  | 15,02    | ↘-33           | < 0.05 | ↘-26           | < 0.05 | 4,79   | /              | > 0.1  | 1                |
|                                          | Phenylacetylglutamine             | 8,55     | M-H-                  | 263,10373       | 263,10342     | 1,2                | 21,98    | ↘-43           | > 0.1  | ↘-38           | > 0.1  | /              | > 0.1  | 4,32     | /              | > 0.1  | /              | > 0.1  | 4,76   | /              | > 0.1  | 1                |
|                                          | Phenylacetylglycine               | 9,53     | M-H-                  | 192,06662       | 192,06639     | 1,2                | 4,68     | ↘-37           | < 0.05 | /              | > 0.1  | /              | > 0.1  | 4,99     | ↘-29           | > 0.1  | /              | > 0.1  | 2,33   | /              | > 0.1  | 1                |
|                                          | Phenylethylamine                  | 13,93    | M+H+                  | 122,09643       | 122,09624     | 1,5                | 17,46    | /              | > 0.1  | /              | < 0.05 | /              | > 0.1  | 6,51     | /              | > 0.1  | ↘-41           | < 0.05 | 8,09   | /              | > 0.1  | 1                |

| Metabolism Pathway    | Metabolite                  | Rt<br>(min) | Adduct   | Calculated<br>mass | Observed<br>mass | Δm/z<br>(ppm) | RSD<br>QC_M | M1          |        | M3          |        | M7          |        | RSD<br>QC_F | F1          |        | F3          |        | RSD<br>QC | F7          |        | Annotation<br>level |
|-----------------------|-----------------------------|-------------|----------|--------------------|------------------|---------------|-------------|-------------|--------|-------------|--------|-------------|--------|-------------|-------------|--------|-------------|--------|-----------|-------------|--------|---------------------|
|                       |                             |             |          |                    |                  |               |             | Diff<br>Amp | pvalue | Diff<br>Amp | pvalue | Diff<br>Amp | pvalue |             | Diff<br>Amp | pvalue | Diff<br>Amp | pvalue |           | Diff<br>Amp | pvalue |                     |
| Purine Metabolism     | 2-Hydroxyadenine            | 2,34        | M+Na+    | 174,03863          | 174,03854        | 0,5           | 8,40        | ↗+22        | > 0.1  | ↗+71        | < 0.1  | /           | > 0.1  | 15,43       | /           | < 0.1  | /           | > 0.1  | 10,67     | ↗+24        | > 0.1  | 2                   |
|                       | 2'-Deoxyguanosine           | 2,27        | M+H+     | 268,10403          | 268,10376        | 1,0           | 6,15        | ↗+45        | < 0.05 | ↘-36        | > 0.1  | /           | > 0.1  | 16,70       | ↘-27        | > 0.1  | ↘-47        | < 0.05 | ND        | ND          | ND     | 1                   |
|                       | 3-Methylxanthine            | 0,97        | M+FA-H-  | 211,04728          | 211,04756        | -1,3          | 2,58        | /           | > 0.1  | /           | > 0.1  | /           | > 0.1  | 12,40       | /           | > 0.1  | ↗+24        | > 0.1  | 3,28      | /           | > 0.1  | 2                   |
|                       | 3'-AMP†                     | 1,21        | M+H+     | 348,07036          | 348,06994        | 1,2           | 22,88       | /           | > 0.1  | ↘-37        | > 0.1  | /           | > 0.1  | 17,48       | ↗+472       | > 0.1  | /           | > 0.1  | 16,86     | /           | > 0.1  | 1                   |
|                       | or Adenosine monophosphate† |             |          |                    |                  |               |             |             |        |             |        |             |        |             |             |        |             |        |           |             |        |                     |
|                       | 8-Hydroxy-deoxyguanosine    | 1,92        | M-H-     | 282,08439          | 282,08414        | 0,9           | 3,83        | /           | < 0.05 | /           | > 0.1  | /           | < 0.1  | 10,03       | /           | > 0.1  | /           | < 0.1  | 7,49      | /           | > 0.1  | 1                   |
|                       | or Guanosine                |             |          |                    |                  |               |             |             |        |             |        |             |        |             |             |        |             |        |           |             |        |                     |
|                       | Adenine                     | 2,89        | M-H-     | 134,04722          | 134,04703        | 1,4           | 1,97        | /           | > 0.1  | /           | > 0.1  | /           | > 0.1  | 10,28       | /           | > 0.1  | /           | > 0.1  | 5,67      | /           | > 0.1  | 1                   |
|                       | Adenosine                   | 3,14        | M+H+     | 268,10403          | 268,10386        | 0,6           | 7,97        | ↘-52        | > 0.1  | ↘-28        | > 0.1  | /           | > 0.1  | 10,89       | ↗+117       | > 0.1  | ↘-25        | > 0.1  | 5,77      | ↘-36        | > 0.1  | 1                   |
|                       | ADP                         | 1,06        | M-H-     | 426,02214          | 426,02168        | 1,1           | 23,97       | /           | > 0.1  | /           | > 0.1  | /           | > 0.1  | ND          | ND          | ND     | ND          | ND     | ND        | ND          | ND     | 1                   |
|                       | Cyclic amp                  | 1,51        | M-H-     | 328,04524          | 328,04500        | 0,7           | 7,21        | ↗+85        | < 0.05 | /           | > 0.1  | /           | > 0.1  | 15,32       | ↘-40        | < 0.1  | ↘-27        | > 0.1  | 2,55      | ↘-30        | > 0.1  | 1                   |
|                       | Deoxyinosine                | 1,87        | M-H-     | 251,07858          | 251,07830        | 1,1           | 14,42       | ↗+52        | < 0.1  | ↘-45        | > 0.1  | ↘-27        | > 0.1  | 9,40        | ↘-32        | < 0.1  | ↘-53        | < 0.05 | 9,75      | ↘-29        | > 0.1  | 1                   |
|                       | dGDP                        | 1,20        | M-H-     | 426,02214          | 426,01991        | 5,2           | 24,18       | /           | > 0.1  | /           | > 0.1  | /           | > 0.1  | 28,46       | ↗+676       | > 0.1  | /           | > 0.1  | ND        | ND          | ND     | 1                   |
|                       | FAPy-adenine                | 2,29        | M+H+     | 154,07234          | 154,07281        | -3,1          | 33,99       | /           | > 0.1  | /           | > 0.1  | /           | > 0.1  | ND          | ND          | ND     | ND          | ND     | 19,03     | ↘-25        | > 0.1  | 1                   |
|                       | Glycine†                    | 1,34        | M+H+     | 76,03930           | 76,03914         | 2,2           | 16,67       | ↘-29        | > 0.1  | /           | > 0.1  | ↘-21        | < 0.1  | 49,04       | /           | > 0.1  | ↗+85        | < 0.05 | 43,21     | ↘-36        | > 0.1  | 1                   |
|                       | Glyoxylic acid†             | 1,25        | M-H-     | 72,99312           | 72,99286         | 3,5           | 43,46       | /           | < 0.05 | /           | > 0.1  | /           | > 0.1  | 3,90        | /           | < 0.1  | /           | > 0.1  | 2,55      | /           | > 0.1  | 1                   |
|                       | Guanine                     | 2,33        | M+H+     | 152,05669          | 152,05655        | 0,9           | 5,22        | ↗+25        | < 0.1  | /           | > 0.1  | /           | > 0.1  | 16,63       | /           | > 0.1  | /           | > 0.1  | 12,53     | /           | > 0.1  | 1                   |
|                       | Guanosine                   | 1,92        | M+H+     | 284,09894          | 284,09883        | 0,4           | 13,44       | /           | > 0.1  | /           | > 0.1  | /           | > 0.1  | 7,86        | /           | > 0.1  | /           | < 0.05 | 2,18      | ↗+34        | > 0.1  | 1                   |
|                       | Guanosine monophosphate     | 1,10        | M-H-     | 362,05072          | 362,05005        | 1,9           | ND          | ND          | ND     | ND          | ND     | ND          | ND     | 23,25       | /           | < 0.1  | ↘-34        | > 0.1  | ND        | ND          | ND     | 1                   |
|                       | Hypoxanthine                | 1,74        | M+H+     | 137,04579          | 137,04570        | 0,6           | 11,71       | /           | > 0.1  | /           | > 0.1  | /           | > 0.1  | 11,14       | /           | > 0.1  | /           | > 0.1  | 9,88      | /           | > 0.1  | 1                   |
|                       | Inosine                     | 1,77        | M-H-     | 267,07349          | 267,07331        | 0,7           | 4,60        | /           | > 0.1  | /           | > 0.1  | /           | < 0.05 | 5,92        | /           | > 0.1  | /           | > 0.1  | 1,75      | /           | > 0.1  | 1                   |
|                       | Inosine-5'-monophosphate    | 1,18        | M-H-     | 347,03982          | 347,03989        | -0,2          | 27,40       | /           | > 0.1  | /           | > 0.1  | ↗+42        | > 0.1  | 6,09        | /           | > 0.1  | ↘-46        | < 0.05 | ND        | ND          | ND     | 1                   |
|                       | Ribose 1-phosphate†         | 2,93        | M-H2O+H+ | 213,01532          | 213,01594        | -2,9          | 23,48       | ↗+37        | > 0.1  | /           | > 0.1  | /           | > 0.1  | 16,43       | ↗+86        | < 0.05 | ↗+26        | > 0.1  | 15,67     | /           | > 0.1  | 2                   |
|                       | Succinyladenosine           | 3,60        | M+H+     | 384,11499          | 384,11485        | 0,4           | 23,18       | /           | > 0.1  | ↗+56        | > 0.1  | /           | > 0.1  | 20,49       | ↘-39        | < 0.05 | /           | > 0.1  | 4,11      | ↘-33        | > 0.1  | 2                   |
|                       | Xanthine                    | 1,64        | M-H-     | 151,02615          | 151,02592        | 1,5           | 10,66       | /           | > 0.1  | ↗+79        | < 0.05 | /           | > 0.1  | 7,59        | ↘-31        | < 0.1  | /           | > 0.1  | 3,98      | /           | > 0.1  | 1                   |
| Pyrimidine Metabolism | 3-methyluridine             | 2,27        | M+FA-H-  | 303,08339          | 303,08270        | 2,3           | ND          | ND          | ND     | ND          | ND     | ND          | ND     | 35,89       | /           | > 0.1  | /           | > 0.1  | ND        | ND          | ND     | 1                   |
|                       | 5-Hydroxymethyluracil       | 1,51        | M-H-     | 141,03057          | 141,03029        | 2,0           | 45,93       | /           | > 0.1  | /           | > 0.1  | /           | < 0.1  | 31,43       | /           | > 0.1  | ↗+29        | > 0.1  | 12,22     | /           | > 0.1  | 1                   |
|                       | 5-Methylcytosine            | 2,31        | M-H-     | 124,05164          | 124,05143        | 1,7           | 23,02       | ↘-48        | < 0.05 | ↗+59        | < 0.1  | ↗+62        | > 0.1  | 16,40       | ↗+21        | > 0.1  | /           | > 0.1  | 2,32      | /           | > 0.1  | 2                   |
|                       | Cytidine                    | 2,66        | M+H+     | 244,09280          | 244,09251        | 1,2           | 5,92        | /           | > 0.1  | /           | > 0.1  | /           | < 0.05 | 12,66       | /           | < 0.1  | /           | > 0.1  | 10,18     | /           | > 0.1  | 1                   |
|                       | Cytosine                    | 2,41        | M+H+     | 112,05054          | 112,05035        | 1,7           | 7,47        | /           | > 0.1  | ↗+32        | > 0.1  | /           | > 0.1  | 18,06       | ↘-21        | < 0.1  | /           | > 0.1  | 8,08      | /           | > 0.1  | 1                   |
|                       | Deoxycytidine               | 3,10        | M+H+     | 228,09788          | 228,09765        | 1,0           | 7,90        | /           | > 0.1  | /           | > 0.1  | ↘-24        | > 0.1  | 15,20       | ↘-36        | < 0.05 | ↘-42        | < 0.05 | 11,61     | /           | > 0.1  | 1                   |
|                       | Deoxyuridine                | 1,85        | M+FA-H-  | 273,07282          | 273,07239        | 1,6           | 18,56       | /           | > 0.1  | /           | > 0.1  | ↘-42        | > 0.1  | ND          | ND          | ND     | ND          | ND     | 3,89      | ↘-23        | > 0.1  | 1                   |
|                       | Dihydrothymine              | 1,97        | M+H+     | 129,06585          | 129,06568        | 1,3           | 15,34       | ↘-41        | > 0.1  | ↘-24        | > 0.1  | ↗+58        | < 0.05 | 3,23        | /           | > 0.1  | ↘-27        | < 0.05 | 14,75     | /           | > 0.1  | 1                   |
|                       | DL-Lactic Acid†             | 6,38        | M-H-     | 89,02442           | 89,02438         | 0,4           | 8,10        | /           | > 0.1  | /           | > 0.1  | ↗+60        | < 0.05 | 10,87       | /           | > 0.1  | ↗+23        | < 0.05 | 5,37      | ↘-27        | > 0.1  | 1                   |
|                       | Hydroxypropionic acid†      | 1,55        | M-H-     | 89,02442           | 89,02440         | 0,2           | 7,75        | /           | > 0.1  | /           | > 0.1  | ↗+68        | < 0.05 | 3,98        | /           | > 0.1  | /           | < 0.05 | 6,90      | ↘-26        | > 0.1  | 1                   |
|                       | L-Glutamine†                | 1,26        | M+H+     | 147,07642          | 147,07623        | 1,3           | 10,01       | /           | > 0.1  | ↘-23        | > 0.1  | /           | < 0.05 | 5,26        | /           | > 0.1  | ↘-38        | < 0.05 | 9,98      | ↘-33        | < 0.05 | 1                   |
|                       | Malonic acid† (3)           | 1,52        | M-H-     | 103,00368          | 103,00355        | 1,3           | 6,72        | /           | > 0.1  | /           | > 0.1  | /           | > 0.1  | 14,66       | ↗+98        | > 0.1  | ↗+35        | > 0.1  | 9,81      | ↘-24        | > 0.1  | 1                   |
|                       | Methylmalonic acid†         | 2,10        | M-H-     | 117,01933          | 117,01917        | 1,4           | 29,45       | /           | > 0.1  | /           | > 0.1  | /           | > 0.1  | 6,07        | /           | > 0.1  | /           | < 0.05 | 25,94     | /           | > 0.1  | 1                   |
|                       | Pseudouridine               | 1,31        | M-H-     | 243,06226          | 243,06153        | 3,0           | ND          | ND          | ND     | ND          | ND     | ND          | ND     | 16,76       | /           | > 0.1  | ↗+40        | < 0.05 | 19,25     | ↘-37        | < 0.05 | 1                   |
|                       | Thymidine                   | 2,39        | M+FA-H-  | 287,08847          | 287,08832        | 0,5           | 14,77       | ↗+50        | < 0.05 | ↘-42        | < 0.05 | /           | > 0.1  | 7,66        | ↘-42        | < 0.05 | ↘-48        | < 0.05 | 3,55      | /           | > 0.1  | 1                   |
|                       | Thymine                     | 1,92        | M-H-     | 125,03565          | 125,03553        | 1,0           | 24,21       | /           | > 0.1  | /           | > 0.1  | /           | > 0.1  | 15,04       | /           | > 0.1  | /           | > 0.1  | 9,69      | /           | > 0.1  | 1                   |
|                       | Uracil†                     | 1,52        | M-H-     | 111,02000          | 111,01988        | 1,1           | 6,25        | /           | > 0.1  | /           | > 0.1  | /           | > 0.1  | 16,21       | ↘-40        | < 0.05 | /           | > 0.1  | 5,90      | /           | > 0.1  | 1                   |
|                       | Ureidoisobutyric acid       | 1,65        | M-H-     | 145,06187          | 145,06047        | 9,6           | ND          | ND          | ND     | ND          | ND     | ND          | ND     | 40,16       | ↘-32        | > 0.1  | /           | < 0.05 | 38,93     | /           | > 0.1  | 1                   |
|                       | Uridine                     | 1,74        | M+FA-H-  | 289,06774          | 289,06764        | 0,3           | 12,15       | /           | > 0.1  | /           | > 0.1  | /           | > 0.1  | 4,97        | /           | > 0.1  | /           | > 0.1  | 3,65      | /           | > 0.1  | 1                   |
| Pyruvate Metabolism   | Acetic acid† (1)            | 1,22        | M+FA-H-  | 105,01933          | 105,01920        | 1,2           | 40,84       | /           | > 0.1  | /           | > 0.1  | /           | > 0.1  | 5,52        | /           | < 0.05 | /           | > 0.1  | 2,71      | /           | > 0.1  | 1                   |
|                       | DL-Lactic Acid†             | 6,38        | M-H-     | 89,02442           | 89,02438         | 0,4           | 8,10        | /           | > 0.1  | /           | > 0.1  | ↗+60        | < 0.05 | 10,87       | /           | > 0.1  | ↗+23        | < 0.05 | 5,37      | ↘-27        | > 0.1  | 1                   |
|                       | Fumaric acid†               | 1,65        | M-H-     | 115,00368          | 115,00356        | 1,1           | 62,36       | /           | > 0.1  | /           | > 0.1  | /           | > 0.1  | 3,66        | /           | < 0.1  | /           | > 0.1  | 89,01     | /           | > 0.1  | 1                   |
|                       | L-malic acid†               | 1,33        | M-H-     | 133,01425          | 133,01402        | 1,7           | 3,82        | /           | > 0.1  | /           | > 0.1  | /           | > 0.1  | 3,09        | /           | < 0.05 | /           | > 0.1  | 4,74      | /           | < 0.05 | 1                   |

| Metabolism Pathway                                              | Metabolite                                                              | Rt<br>(min) | Adduct   | Calculated<br>mass | Observed<br>mass | Δm/z<br>(ppm) | RSD<br>QC_M | M1          |        | M3          |        | M7          |        | RSD<br>QC_F | F1          |        | F3          |        | RSD<br>QC | F7          |        | Annotation<br>level |
|-----------------------------------------------------------------|-------------------------------------------------------------------------|-------------|----------|--------------------|------------------|---------------|-------------|-------------|--------|-------------|--------|-------------|--------|-------------|-------------|--------|-------------|--------|-----------|-------------|--------|---------------------|
|                                                                 |                                                                         |             |          |                    |                  |               |             | Diff<br>Amp | pvalue | Diff<br>Amp | pvalue | Diff<br>Amp | pvalue |             | Diff<br>Amp | pvalue | Diff<br>Amp | pvalue |           | Diff<br>Amp | pvalue |                     |
| Steroid hormone<br>biosynthesis                                 | 4-Methylpentanal                                                        | 10,07       | M+ACN+H+ | 142,12264          | 142,12243        | 1,5           | 64,73       | /           | > 0.1  | ↗+124       | < 0.05 | /           | > 0.1  | 9,93        | /           | > 0.1  | /           | > 0.1  | 9,32      | /           | > 0.1  | 1                   |
|                                                                 | Cortolone                                                               | 11,95       | M+FA-H-  | 411,23883          | 411,23826        | 1,4           | 24,20       | /           | > 0.1  | /           | > 0.1  | /           | > 0.1  | 10,37       | /           | < 0.1  | /           | > 0.1  | 24,76     | /           | < 0.1  | 1                   |
|                                                                 | Mevalonic acid                                                          | 1,90        | M-H-     | 147,06628          | 147,06607        | 1,4           | 38,13       | /           | > 0.1  | /           | > 0.1  | /           | > 0.1  | 6,37        | ↗+25        | > 0.1  | /           | > 0.1  | 8,10      | /           | > 0.1  | 1                   |
| Tryptophan<br>Metabolism                                        | Tetrahydrocortisol                                                      | 12,24       | M+FA-H-  | 411,23883          | 411,23790        | 2,2           | 36,67       | ↗+49        | < 0.05 | /           | > 0.1  | /           | > 0.1  | 21,29       | /           | > 0.1  | /           | > 0.1  | 12,15     | /           | > 0.1  | 1                   |
|                                                                 | 3-hydroxyanthranilic acid                                               | 5,53        | M+H+     | 154,04987          | 154,04939        | 3,1           | 49,32       | /           | > 0.1  | /           | > 0.1  | /           | > 0.1  | ND          | ND          | ND     | ND          | ND     | ND        | ND          | ND     | 1                   |
|                                                                 | 5-Hydroxykynurenine                                                     | 8,49        | M+H+     | 225,08698          | 225,08675        | 1,0           | 8,00        | ↘-25        | < 0.05 | /           | > 0.1  | /           | < 0.05 | 8,75        | /           | < 0.1  | /           | < 0.1  | 5,93      | /           | > 0.1  | 2                   |
|                                                                 | Anthranilate                                                            | 5,77        | M+H+     | 138,05495          | 138,05461        | 2,5           | 20,46       | /           | > 0.1  | /           | > 0.1  | /           | > 0.1  | 4,71        | /           | > 0.1  | /           | > 0.1  | 8,54      | ↘-20        | > 0.1  | 1                   |
|                                                                 | DL-kynurenine                                                           | 8,73        | M+H+     | 209,09207          | 209,09197        | 0,5           | 7,68        | /           | > 0.1  | /           | > 0.1  | /           | > 0.1  | 9,18        | /           | < 0.05 | ↘-24        | < 0.05 | 6,53      | /           | > 0.1  | 1                   |
|                                                                 | Formylanthranilic acid                                                  | 11,46       | M-H-     | 164,03532          | 164,03499        | 2,0           | 8,63        | /           | > 0.1  | /           | > 0.1  | /           | > 0.1  | 3,67        | ↗+23        | < 0.05 | /           | > 0.1  | 4,12      | /           | > 0.1  | 1                   |
|                                                                 | Indolelactic acid                                                       | 1,40        | M+H+     | 206,08117          | 206,08296        | -8,7          | 42,84       | /           | > 0.1  | /           | > 0.1  | /           | > 0.1  | ND          | ND          | ND     | ND          | ND     | ND        | ND          | ND     | 1                   |
|                                                                 | Kynurenic acid                                                          | 10,27       | M+H+     | 190,04987          | 190,04922        | 3,4           | 36,51       | ↗+882       | < 0.05 | ↗+126       | > 0.1  | /           | < 0.05 | 30,65       | ↘-50        | > 0.1  | /           | > 0.1  | ND        | ND          | ND     | 1                   |
|                                                                 | L-Tryptophan†                                                           | 11,58       | M+H+     | 205,09715          | 205,09700        | 0,7           | 6,00        | /           | > 0.1  | ↘-29        | < 0.05 | /           | > 0.1  | 7,93        | /           | < 0.05 | ↘-46        | < 0.05 | 26,28     | /           | > 0.1  | 1                   |
|                                                                 | N'-Formylkynurenine                                                     | 7,23        | M-H-     | 235,07243          | 235,07182        | 2,6           | ND          | ND          | ND     | ND          | ND     | ND          | ND     | 9,02        | ↘-36        | > 0.1  | ↘-52        | < 0.05 | 42,11     | /           | > 0.1  | 1                   |
| Tyrosine Metabolism                                             | Oxadipic acid†                                                          | 1,63        | M-H-     | 159,02990          | 159,02996        | -0,4          | 51,01       | /           | < 0.05 | /           | > 0.1  | ND          | ND     | ND          | ND          | ND     | ND          | ND     | ND        | ND          | ND     | 1                   |
|                                                                 | Serotonin                                                               | 10,46       | M+H+     | 177,10224          | 177,10175        | 2,8           | 27,30       | ↘-36        | > 0.1  | /           | > 0.1  | ↗+334       | < 0.05 | 13,68       | ↘-63        | < 0.05 | ↘-26        | > 0.1  | 7,78      | ↗+95        | < 0.1  | 1                   |
|                                                                 | 1,2-Dehydrosalsolinol                                                   | 9,84        | M+H+     | 178,08625          | 178,08608        | 1,0           | 12,16       | ↗+31        | > 0.1  | ↗+55        | > 0.1  | /           | > 0.1  | 18,86       | ↗+84        | > 0.1  | ↘-31        | < 0.1  | 16,79     | ↗+87        | > 0.1  | 2                   |
|                                                                 | 3-Hydroxyphenylacetic acid†                                             | 9,69        | M-H-     | 151,04007          | 151,03971        | 2,4           | 5,47        | /           | > 0.1  | /           | > 0.1  | /           | > 0.1  | 15,54       | /           | > 0.1  | /           | > 0.1  | 5,06      | /           | > 0.1  | 1                   |
|                                                                 | 3,4-Dihydroxybenzeneacetic<br>acid                                      | 5,67        | M-H-     | 167,03498          | 167,03480        | 1,1           | ND          | ND          | ND     | ND          | ND     | ND          | ND     | 23,22       | /           | > 0.1  | /           | > 0.1  | 103,85    | /           | > 0.1  | 1                   |
|                                                                 | 3,4-dihydroxymandelaldehyde                                             | 4,49        | M-H-     | 167,03498          | 167,03462        | 2,2           | 45,02       | /           | > 0.1  | ↗+71        | < 0.1  | /           | > 0.1  | 32,64       | /           | > 0.1  | /           | < 0.1  | 32,50     | /           | > 0.1  | 1                   |
|                                                                 | 4-Hydroxyphenylacetaldehyde                                             | 11,61       | M-H-     | 135,04515          | 135,04517        | -0,1          | 30,26       | /           | < 0.1  | /           | > 0.1  | /           | > 0.1  | 21,58       | /           | > 0.1  | /           | > 0.1  | 12,66     | /           | > 0.1  | 1                   |
|                                                                 | 4-Hydroxyphenylacetylglutamic<br>acid                                   | 8,24        | M+H+     | 282,09721          | 282,09697        | 0,9           | 6,51        | ↘-36        | > 0.1  | ↘-20        | > 0.1  | ↗+57        | < 0.1  | 25,61       | ↘-49        | < 0.1  | /           | > 0.1  | 4,88      | /           | > 0.1  | 2                   |
|                                                                 | 4-methoxytyramine                                                       | 10,70       | M+H+     | 168,10190          | 168,10149        | 2,5           | ND          | ND          | ND     | ND          | ND     | ND          | ND     | 56,11       | /           | > 0.1  | /           | > 0.1  | 10,06     | ↗+56        | > 0.1  | 1                   |
|                                                                 | 6-Hydroxydopamine                                                       | 3,40        | M+H+     | 170,08117          | 170,08075        | 2,5           | 16,57       | ↘-42        | > 0.1  | ↗+50        | > 0.1  | /           | > 0.1  | 43,64       | /           | > 0.1  | /           | > 0.1  | ND        | ND          | ND     | 1                   |
|                                                                 | Dopamine 4-sulfate                                                      | 2,09        | M-H-     | 232,02852          | 232,02826        | 1,1           | 64,71       | /           | > 0.1  | ↗+95        | > 0.1  | /           | < 0.05 | 23,96       | /           | > 0.1  | ↘-27        | > 0.1  | 40,91     | /           | > 0.1  | 1                   |
|                                                                 | Epinephrine                                                             | 3,67        | M+H+     | 184,09682          | 184,09673        | 0,5           | 21,22       | ↗+88        | < 0.05 | /           | > 0.1  | ↗+43        | > 0.1  | 35,09       | /           | > 0.1  | /           | > 0.1  | ND        | ND          | ND     | 1                   |
|                                                                 | Fumaric acid†                                                           | 1,65        | M-H-     | 115,00368          | 115,00356        | 1,1           | 62,36       | /           | > 0.1  | /           | > 0.1  | /           | > 0.1  | 3,66        | /           | < 0.1  | /           | > 0.1  | 89,01     | /           | > 0.1  | 1                   |
|                                                                 | Gamma-glutamyltyrosine                                                  | 6,98        | M-H-     | 309,10921          | 309,10871        | 1,6           | 7,04        | /           | > 0.1  | /           | > 0.1  | /           | > 0.1  | 6,64        | ↘-31        | < 0.05 | ↘-20        | < 0.05 | 4,29      | ↘-23        | < 0.05 | 1                   |
|                                                                 | Homovanillic acid                                                       | 9,86        | M-H-     | 181,05063          | 181,04992        | 3,9           | ND          | ND          | ND     | ND          | ND     | ND          | ND     | 19,06       | ↗+22        | > 0.1  | /           | > 0.1  | 69,36     | /           | > 0.1  | 1                   |
|                                                                 | Hydroxyphenylacetylglycine                                              | 5,02        | M-H-     | 208,06153          | 208,06126        | 1,3           | 36,39       | ↘-50        | < 0.1  | ↗+73        | < 0.1  | /           | > 0.1  | ND          | ND          | ND     | ND          | ND     | ND        | ND          | ND     | 1                   |
|                                                                 | L-Tyrosine†                                                             | 3,54        | M+H+     | 182,08117          | 182,08109        | 0,4           | 3,48        | /           | > 0.1  | ↘-21        | < 0.1  | /           | > 0.1  | 7,07        | /           | < 0.05 | ↘-37        | < 0.05 | 7,35      | /           | > 0.1  | 1                   |
|                                                                 | N-Acetyl-L-tyrosine                                                     | 7,29        | M-H-     | 222,07718          | 222,07692        | 1,2           | 5,10        | /           | > 0.1  | /           | > 0.1  | /           | > 0.1  | 18,46       | ↘-33        | < 0.05 | ↘-27        | < 0.05 | 4,00      | /           | > 0.1  | 1                   |
|                                                                 | Norepinephrine                                                          | 2,73        | M-H-     | 168,06662          | 168,06636        | 1,6           | 24,58       | /           | > 0.1  | /           | > 0.1  | /           | > 0.1  | 17,27       | /           | < 0.05 | /           | > 0.1  | 8,69      | /           | > 0.1  | 1                   |
|                                                                 | Normetanephine                                                          | 4,84        | M-H2O+H+ | 166,08571          | 166,08594        | -1,4          | 68,15       | /           | > 0.1  | /           | > 0.1  | /           | > 0.1  | 11,66       | /           | > 0.1  | /           | > 0.1  | 27,92     | /           | > 0.1  | 1                   |
|                                                                 | O-tyrosine                                                              | 7,40        | M+H+     | 182,08117          | 182,08061        | 3,1           | 19,76       | ↗+37        | < 0.1  | ↘-24        | > 0.1  | /           | > 0.1  | 27,38       | /           | > 0.1  | /           | > 0.1  | 4,31      | /           | > 0.1  | 1                   |
| Valine, leucine and<br>isoleucine Metabolism<br>and derivatives | P-octopamine                                                            | 3,54        | M-H2O+H+ | 136,07514          | 136,07558        | -3,3          | 5,28        | /           | > 0.1  | ↘-21        | < 0.1  | /           | > 0.1  | 5,31        | /           | < 0.05 | ↘-37        | < 0.05 | 6,78      | ↘-33        | < 0.05 | 1                   |
|                                                                 | Phenol                                                                  | 7,81        | M-H2O+H+ | 77,03803           | 77,03796         | 0,9           | 34,25       | /           | < 0.1  | ↘-46        | < 0.05 | /           | > 0.1  | 17,62       | /           | < 0.1  | ↘-49        | < 0.05 | 1,47      | ↘-31        | > 0.1  | 2                   |
|                                                                 | Tyramine                                                                | 8,11        | M+H+     | 138,09134          | 138,09120        | 1,0           | 15,36       | /           | > 0.1  | ↘-21        | < 0.1  | ↗+30        | > 0.1  | 21,72       | /           | > 0.1  | /           | > 0.1  | 25,93     | /           | > 0.1  | 1                   |
|                                                                 | 3-Methyl-2-oxovaleric acid                                              | 7,05        | M-H-     | 129,05572          | 129,05557        | 1,1           | 42,03       | /           | > 0.1  | /           | > 0.1  | /           | > 0.1  | 26,41       | ND          | ND     | /           | > 0.1  | 15,67     | /           | > 0.1  | 1                   |
|                                                                 | DL-isoleucine<br>or L-Alloisoleucine<br>or L-Isoleucine<br>or L-Leucine | 3,92        | M+H+     | 132,10190          | 132,10175        | 1,2           | 68,62       | /           | > 0.1  | /           | > 0.1  | /           | < 0.05 | 18,82       | ↘-26        | < 0.05 | /           | > 0.1  | 3,19      | ↘-22        | > 0.1  | 1                   |
|                                                                 | Erythronilic acid                                                       | 2,71        | M-H2O-H- | 99,04460           | 99,04504         | -4,4          | 9,16        | ↗+60        | > 0.1  | ↘-28        | > 0.1  | /           | > 0.1  | 5,61        | ↗+48        | < 0.1  | /           | > 0.1  | 4,90      | /           | > 0.1  | 2                   |
|                                                                 | Hydroxyisocaproic acid                                                  | 8,74        | M-H-     | 131,07137          | 131,07114        | 1,8           | 2,29        | /           | > 0.1  | ↗+125       | < 0.05 | /           | > 0.1  | 2,36        | ↘-40        | < 0.05 | ↘-22        | > 0.1  | 78,98     | /           | > 0.1  | 1                   |
|                                                                 | L-Valine                                                                | 2,69        | M+H+     | 118,08625          | 118,08606        | 1,6           | 6,42        | /           | > 0.1  | /           | > 0.1  | /           | > 0.1  | 67,03       | /           | < 0.05 | /           | < 0.05 | 50,61     | ↗+89        | > 0.1  | 1                   |
|                                                                 | Methylmalonic acid†                                                     | 2,10        | M-H-     | 117,01933          | 117,01917        | 1,4           | 29,45       | /           | > 0.1  | /           | > 0.1  | /           | > 0.1  | 6,07        | /           | > 0.1  | /           | < 0.05 | 25,94     | /           | > 0.1  | 1                   |
|                                                                 | N-acetylisoleucine                                                      | 9,44        | M-H-     | 172,09792          | 172,09771        | 1,2           | 4,41        | /           | > 0.1  | /           | > 0.1  | /           | > 0.1  | 2,30        | ↘-34        | < 0.05 | ↘-30        | < 0.05 | 4,96      | /           | > 0.1  | 1                   |
|                                                                 | N-Acetylvaline                                                          | 4,80        | M-H-     | 158,08227          | 158,08198        | 1,8           | 11,99       | ↘-29        | < 0.05 | /           | > 0.1  | /           | > 0.1  | 19,66       | ↘-35        | < 0.05 | /           | > 0.1  | 11,07     | /           | > 0.1  | 1                   |
|                                                                 | Pyridoxal†                                                              | 3,29        | M+H+     | 168,06552          | 168,06556        | -0,2          | ND          | ND          | ND     | ND          | ND     | ND          | ND     | 40,24       | /           | > 0.1  | /           | > 0.1  | 30,99     | /           | > 0.1  | 1                   |

| Metabolism Pathway    | Metabolite               | Rt<br>(min) | Adduct   | Calculated<br>mass | Observed<br>mass | Δm/z<br>(ppm) | RSD<br>QC_M | M1          |        | M3          |        | M7          |        | RSD<br>QC_F | F1          |        | F3          |        | RSD<br>QC | F7          |        | Annotation<br>level |
|-----------------------|--------------------------|-------------|----------|--------------------|------------------|---------------|-------------|-------------|--------|-------------|--------|-------------|--------|-------------|-------------|--------|-------------|--------|-----------|-------------|--------|---------------------|
|                       |                          |             |          |                    |                  |               |             | Diff<br>Amp | pvalue | Diff<br>Amp | pvalue | Diff<br>Amp | pvalue |             | Diff<br>Amp | pvalue | Diff<br>Amp | pvalue |           | Diff<br>Amp | pvalue |                     |
| Vitamin B6 metabolism | 4-Pyridoxic acid         | 1,44        | M-H-     | 182,04588          | 182,04566        | 1,2           | 7,38        | /           | > 0.1  | ↘-46        | < 0.1  | /           | > 0.1  | 2,04        | /           | > 0.1  | /           | > 0.1  | 3,63      | /           | > 0.1  | 1                   |
|                       | 5-Pyridoxolactone        | 3,25        | M-H-     | 164,03532          | 164,03500        | 1,9           | 8,12        | /           | > 0.1  | ↗+24        | > 0.1  | /           | > 0.1  | 5,94        | ↗+26        | < 0.1  | /           | > 0.1  | 1,47      | /           | > 0.1  | 2                   |
|                       | L-Glutamine†             | 1,26        | M+H+     | 147,07642          | 147,07623        | 1,3           | 10,01       | /           | > 0.1  | ↘-23        | > 0.1  | /           | < 0.05 | 5,26        | /           | > 0.1  | ↘-38        | < 0.05 | 9,98      | ↘-33        | < 0.05 | 1                   |
|                       | Pyridoxal†               | 3,29        | M+H+     | 168,06552          | 168,06556        | -0,2          | ND          | ND          | ND     | ND          | ND     | ND          | ND     | 40,24       | /           | > 0.1  | /           | > 0.1  | 30,99     | /           | > 0.1  | 1                   |
|                       | Pyridoxine               | 10,81       | M-H2O-H- | 150,05550          | 150,05581        | -2,1          | 31,43       | /           | > 0.1  | /           | > 0.1  | /           | < 0.1  | 16,81       | ↗+66        | < 0.05 | /           | > 0.1  | 10,92     | ↗+24        | > 0.1  | 2                   |
| Other metabolites     | 2-Aminoisobutyric acid   | 1,55        | M-H-     | 102,05605          | 102,05577        | 2,7           | 4,86        | /           | > 0.1  | /           | < 0.1  | /           | > 0.1  | 65,88       | /           | > 0.1  | /           | < 0.05 | ND        | ND          | ND     | 1                   |
|                       | 2-Ketohexanoic acid      | 3,56        | M+H+     | 131,07027          | 131,07023        | 0,3           | 39,56       | /           | > 0.1  | /           | > 0.1  | /           | > 0.1  | 12,72       | ↗+49        | < 0.1  | /           | > 0.1  | 9,85      | /           | > 0.1  | 2                   |
|                       | 2-Methylglutaric acid    | 4,46        | M-H-     | 145,05063          | 145,05034        | 2,0           | 5,21        | ↗+66        | > 0.1  | ↘-31        | > 0.1  | /           | > 0.1  | 16,01       | /           | < 0.1  | /           | > 0.1  | 19,42     | /           | > 0.1  | 1                   |
|                       | 4-Aminobutyraldehyde     | 1,37        | M+FA-H-  | 132,06661          | 132,06641        | 1,6           | 19,38       | ↘-21        | > 0.1  | /           | > 0.1  | /           | > 0.1  | 28,55       | /           | > 0.1  | /           | < 0.05 | 32,51     | /           | > 0.1  | 2                   |
|                       | 8-Methylnonenoate        | 12,93       | M+FA-H-  | 215,12888          | 215,12845        | 2,0           | 64,21       | /           | > 0.1  | /           | > 0.1  | /           | > 0.1  | 45,42       | /           | > 0.1  | /           | > 0.1  | 8,18      | /           | > 0.1  | 1                   |
|                       | Acetolactate             | 1,21        | M-H-     | 131,03498          | 131,03466        | 2,5           | 57,49       | /           | < 0.05 | /           | < 0.1  | /           | > 0.1  | 34,69       | /           | > 0.1  | /           | < 0.05 | 28,73     | /           | > 0.1  | 1                   |
|                       | Ascorbic acid            | 1,31        | M-H-     | 175,02481          | 175,02594        | -6,4          | ND          | ND          | ND     | ND          | ND     | ND          | ND     | 12,10       | /           | > 0.1  | /           | > 0.1  | 4,80      | /           | > 0.1  | 1                   |
|                       | Ethyladipic acid         | 10,35       | M-H-     | 173,08193          | 173,08160        | 1,9           | 5,94        | ↗+81        | < 0.1  | ↘-28        | > 0.1  | /           | > 0.1  | 3,18        | ↗+40        | < 0.1  | ↗+26        | > 0.1  | 2,68      | /           | > 0.1  | 2                   |
|                       | Gamma glutamyl ornithine | 3,19        | M-H2O+H+ | 244,12863          | 244,12905        | -1,7          | ND          | ND          | ND     | ND          | ND     | ND          | ND     | 34,59       | /           | > 0.1  | /           | < 0.05 | 31,46     | ↘-53        | < 0.05 | 2                   |
|                       | Indoleacrylic acid       | 11,58       | M+H+     | 188,07060          | 188,07043        | 1,0           | 21,35       | /           | > 0.1  | /           | < 0.05 | /           | > 0.1  | 6,94        | /           | < 0.05 | ↘-47        | < 0.05 | 8,12      | /           | > 0.1  | 2                   |
|                       | L-Acetylcarnitine        | 5,78        | M+H+     | 204,12303          | 204,12283        | 1,0           | 4,28        | /           | > 0.1  | /           | > 0.1  | ↗+63        | < 0.1  | 7,76        | ↘-33        | > 0.1  | /           | > 0.1  | 37,57     | /           | > 0.1  | 1                   |
|                       | L-Carnitine              | 2,68        | M+H+     | 162,11247          | 162,11228        | 1,1           | 3,90        | /           | > 0.1  | /           | > 0.1  | /           | > 0.1  | 22,58       | /           | > 0.1  | /           | < 0.1  | 10,78     | /           | > 0.1  | 1                   |
|                       | L-homocysteic acid       | 1,02        | M-H-     | 182,01287          | 182,01254        | 1,8           | 2,44        | /           | > 0.1  | /           | > 0.1  | /           | > 0.1  | 3,03        | /           | > 0.1  | /           | > 0.1  | 0,98      | /           | > 0.1  | 1                   |
|                       | N-acetyl-L-alanineØ      | 1,81        | M-H-     | 130,05097          | 130,05079        | 1,4           | 13,27       | /           | > 0.1  | /           | > 0.1  | /           | < 0.05 | 1,91        | /           | < 0.05 | /           | < 0.05 | 3,37      | /           | > 0.1  | 1                   |
|                       | N-alpha-Acetyl-L-lysine  | 2,60        | M+H+     | 189,12337          | 189,12311        | 1,4           | 33,09       | /           | > 0.1  | /           | > 0.1  | /           | > 0.1  | 43,17       | /           | > 0.1  | /           | < 0.05 | 15,58     | /           | > 0.1  | 1                   |
|                       | N-alpha-acetylcitrulline | 1,47        | M-H-     | 216,09898          | 216,09843        | 2,5           | ND          | ND          | ND     | ND          | ND     | ND          | ND     | ND          | ND          | ND     | ND          | ND     | 15,13     | ↘-22        | < 0.05 | 1                   |
|                       | O-Propanoyl-D-carnitine  | 10,38       | M+H+     | 218,13868          | 218,13854        | 0,7           | 9,90        | ↗+172       | > 0.1  | ↗+478       | > 0.1  | ↗+779       | < 0.1  | 14,08       | ↗+25        | > 0.1  | /           | > 0.1  | 15,46     | ↘-40        | > 0.1  | 2                   |
|                       | Phosphate                | 0,98        | M+FA-H-  | 142,97510          | 142,97481        | 2,0           | 8,69        | /           | > 0.1  | /           | > 0.1  | /           | > 0.1  | 3,28        | /           | > 0.1  | /           | > 0.1  | 1,96      | /           | > 0.1  | 2                   |
|                       | Phosphoglycolic acid     | 0,93        | M-H-     | 154,97510          | 154,97536        | -1,7          | 50,55       | ↗+78        | > 0.1  | /           | > 0.1  | /           | > 0.1  | ND          | ND          | ND     | ND          | ND     | 24,35     | /           | > 0.1  | 1                   |
|                       | Phtalic acid             | 9,31        | M-H-     | 165,01933          | 165,01904        | 1,8           | 6,44        | /           | > 0.1  | /           | > 0.1  | ↗+84        | < 0.05 | 20,39       | /           | > 0.1  | /           | > 0.1  | 3,54      | /           | > 0.1  | 1                   |
|                       | Pyrrolidin-2-one         | 1,85        | M+Na+    | 108,04198          | 108,04183        | 1,4           | 7,98        | ↗+147       | < 0.05 | /           | > 0.1  | ↘-22        | > 0.1  | 9,66        | /           | > 0.1  | /           | > 0.1  | 14,47     | /           | > 0.1  | 1                   |
|                       | Salsoline-1-carboxylate  | 9,94        | M+H+     | 238,10738          | 238,10709        | 1,2           | 14,57       | ↘-28        | < 0.1  | /           | > 0.1  | /           | > 0.1  | 13,13       | ↘-24        | < 0.05 | /           | > 0.1  | 8,50      | /           | > 0.1  | 2                   |
|                       | Salsolinol 1-carboxylate | 3,15        | M+FA-H-  | 268,08266          | 268,07997        | 10,0          | 36,24       | /           | < 0.05 | /           | > 0.1  | /           | < 0.05 | ND          | ND          | ND     | ND          | ND     | ND        | ND          | ND     | 1                   |
|                       | Tetradecandioic acid     | 14,19       | M-H-     | 257,17583          | 257,17552        | 1,2           | 3,49        | /           | > 0.1  | /           | > 0.1  | /           | > 0.1  | 3,61        | /           | < 0.1  | /           | < 0.1  | 9,72      | /           | > 0.1  | 1                   |
|                       | Vanillactic acid         | 8,64        | M-H-     | 211,06120          | 211,06092        | 1,3           | 14,52       | ↗+39        | > 0.1  | ↘-28        | > 0.1  | /           | > 0.1  | 8,97        | /           | > 0.1  | /           | > 0.1  | 16,73     | /           | > 0.1  | 1                   |
|                       | Vanillic acid 4-sulfate  | 10,65       | M+FA-H-  | 293,11430          | 293,11410        | 0,7           | 7,21        | /           | > 0.1  | /           | > 0.1  | ↘-25        | < 0.1  | 6,54        | ↘-38        | < 0.05 | ↘-26        | < 0.05 | 4,96      | ↘-37        | < 0.05 | 2                   |
|                       | Vanillylamine            | 11,75       | M+H+     | 154,08625          | 154,08603        | 1,4           | 20,71       | ↗+43        | > 0.1  | ↘-34        | > 0.1  | /           | > 0.1  | 11,40       | ↗+24        | > 0.1  | /           | > 0.1  | 8,52      | /           | > 0.1  | 2                   |

**Figure S1:** Quantitative enrichment analysis for male mussels exposed to 10 µg/L of venlafaxine after 1 day (A), 3 days (B) and 7 days (C). Red lines and rectangles represent pathways with a  $p$ -value < 0.1, blue lines and rectangles represent pathways with  $p$ -value < 0.05.

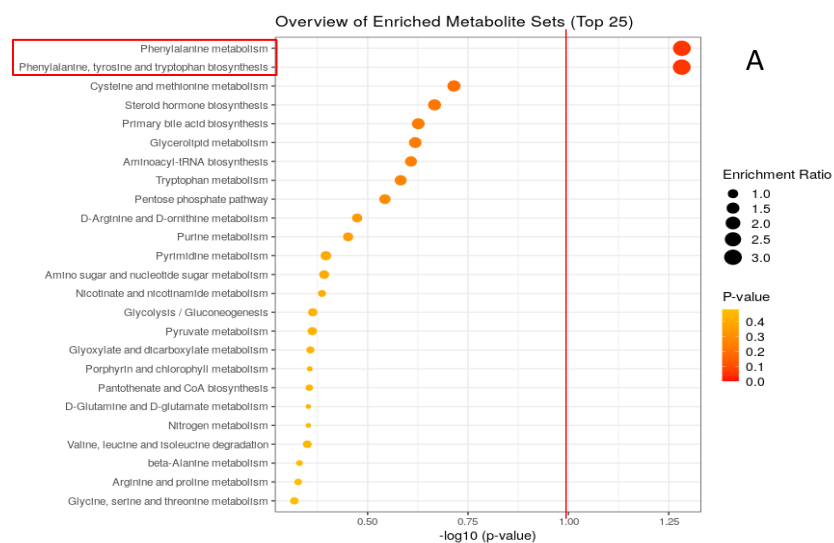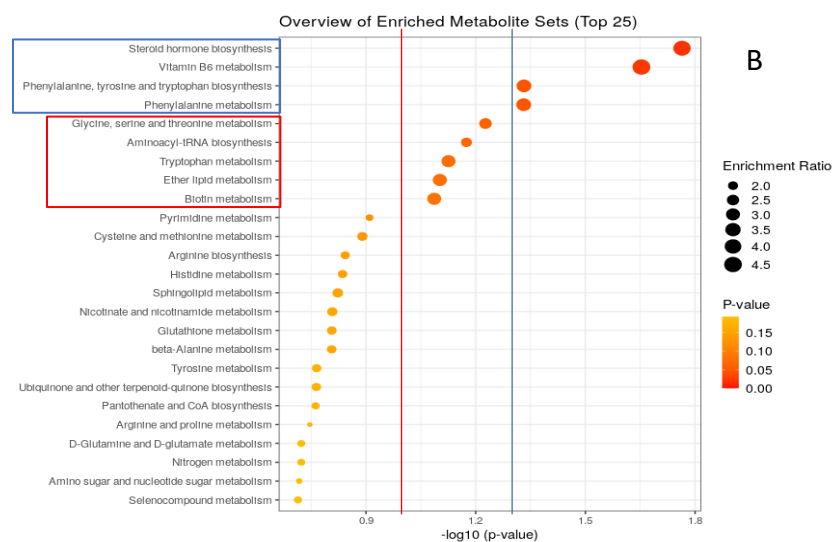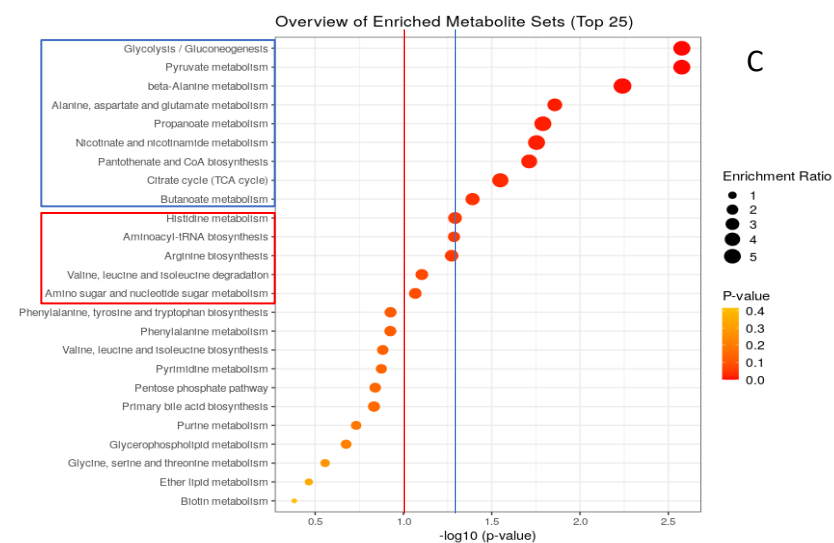

**Figure S2:** Quantitative enrichment analysis for female mussels exposed to 10 µg/L of venlafaxine after 1 day (A), 3 days (B) and 7 days (C). Red lines and rectangles represent pathways with a p-value < 0.1, blue lines and rectangles represent pathways with p-value < 0.05.

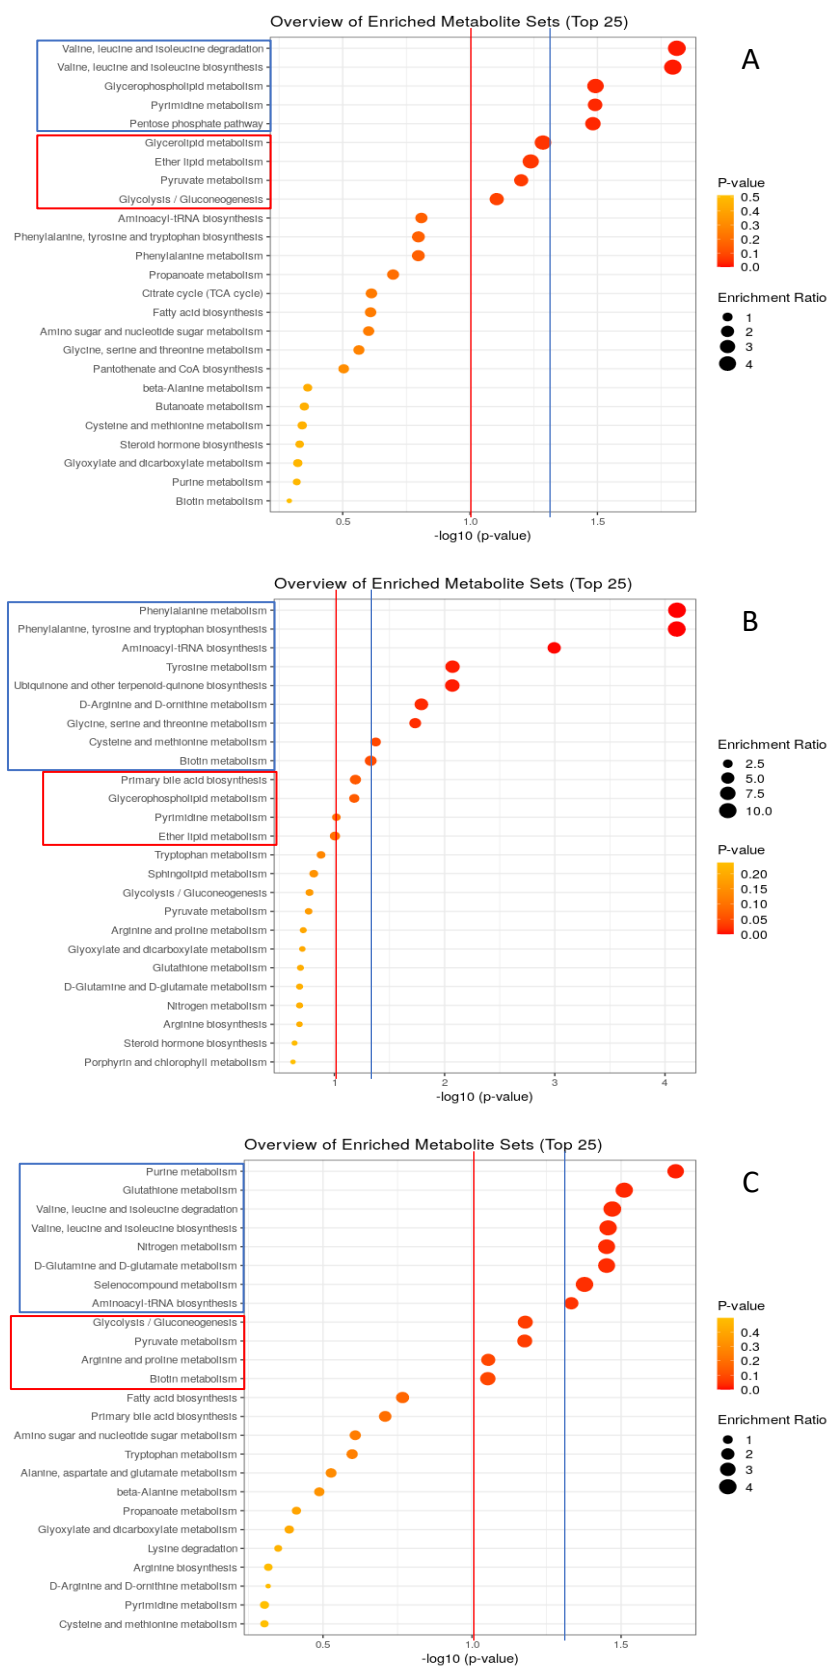

Supplement: s1 [file s1]
